# Supplementary material
Source: publisher figshare collection journal article supplement (https://springernature.figshare.com/ndownloader/files/16126085)
Supplement: Supplementary file 1 [file 16126085]

Reference,UNREGION2,UNREGION1,Country,Site name,Longitude,Latitude,Year,,,,,,,,
Alahmed et al 2010,Asia,Western Asia,Saudi Arabia,Makkah Al Mukarramah,39.82,21.43,2010,,,,,,,,
Alahmed et al 2010,Asia,Western Asia,Saudi Arabia,Al Taif,40.42,21.27,2010,,,,,,,,
Alahmed et al 2010,Asia,Western Asia,Saudi Arabia,Jeddaha,39.17,21.54,2010,,,,,,,,
Alahmed et al 2010,Asia,Western Asia,Saudi Arabia,Riyadh,46.72,24.69,2010,,,,,,,,
Alahmed et al 2010,Asia,Western Asia,Saudi Arabia,Al Qassim,42.86,25.83,2010,,,,,,,,
Alahmed et al 2010,Asia,Western Asia,Saudi Arabia,Al Hassa (=Al Hasa?),49.6,25.4,2010,,,,,,,,
Alahmed et al 2010,Asia,Western Asia,Saudi Arabia,Al Dammam,50.15,26.4,2010,,,,,,,,
Alahmed et al 2010,Asia,Western Asia,Saudi Arabia,Hail,41.7,27.5,2010,,,,,,,,
Alahmed et al 2010,Asia,Western Asia,Saudi Arabia,Najran,44.13,17.49,2010,,,,,,,,
Alahmed et al 2010,Asia,Western Asia,Saudi Arabia,Jazan (=Jizan),42.57,16.88,2010,,,,,,,,
AlBusaidy and Mellor 1991,Asia,Western Asia,Oman,Nakhal,57.83,23.38,1991,,,,,,,,
Arenas-Montes et al 2016,Europe,Southern Europe,Spain,,-4.49,37.32,2007-2014,,,,,,,,
Arenas-Montes et al 2016,Europe,Southern Europe,Spain,,-7.11,37.4,2007-2014,,,,,,,,
Arenas-Montes et al 2016,Europe,Southern Europe,Spain,,-4.11,36.73,2007-2014,,,,,,,,
Arenas-Montes et al 2016,Europe,Southern Europe,Spain,,-5.02,36.85,2007-2014,,,,,,,,
Arenas-Montes et al 2016,Europe,Southern Europe,Spain,,-6.44,37.82,2007-2014,,,,,,,,
Arenas-Montes et al 2016,Europe,Southern Europe,Spain,,-5.36,36.78,2007-2014,,,,,,,,
Arenas-Montes et al 2016,Europe,Southern Europe,Spain,,-6.99,37.83,2007-2014,,,,,,,,
Arenas-Montes et al 2016,Europe,Southern Europe,Spain,,-5.6,37.98,2007-2014,,,,,,,,
Arenas-Montes et al 2016,Europe,Southern Europe,Spain,,-5.11,37.57,2007-2014,,,,,,,,
Arenas-Montes et al 2016,Europe,Southern Europe,Spain,,-3.52,36.75,2007-2014,,,,,,,,
Arenas-Montes et al 2016,Europe,Southern Europe,Spain,,-4.15,38.18,2007-2014,,,,,,,,
Arenas-Montes et al 2016,Europe,Southern Europe,Spain,,-3.88,37.36,2007-2014,,,,,,,,
Arenas-Montes et al 2016,Europe,Southern Europe,Spain,,-3.52,38.26,2007-2014,,,,,,,,
Arenas-Montes et al 2016,Europe,Southern Europe,Spain,,-7.35,37.54,2007-2014,,,,,,,,
Arenas-Montes et al 2016,Europe,Southern Europe,Spain,,-2.98,36.76,2007-2014,,,,,,,,
Arenas-Montes et al 2016,Europe,Southern Europe,Spain,,-1.99,37.58,2007-2014,,,,,,,,
Arenas-Montes et al 2016,Europe,Southern Europe,Spain,,-5.05,38.43,2007-2014,,,,,,,,
Arenas-Montes et al 2016,Europe,Southern Europe,Spain,,-2.14,36.86,2007-2014,,,,,,,,
Arenas-Montes et al 2016,Europe,Southern Europe,Spain,,-2.18,37.86,2007-2014,,,,,,,,
"Bailly-Choumara and Kremer, 1970",Africa,Northern Africa,Morocco,Tnine des Oudaya (site 9),-8.257,31.627,1970,,,,,,,,
Bakhoum et al 2016,Africa,Western Africa,Senegal,,-17.33,14.73,2012,,,,,,,,
"Baldet as cited by Guichard et al, 2014",Africa,Eastern Africa,Ethiopia,"Belbelati, Habro",40.413,8.708,2004,,,,,,,,
"Baldet as cited by Guichard et al, 2014",Africa,Eastern Africa,Ethiopia,"PA12, Kuni",40.721,8.856,2004,,,,,,,,
"Baldet as cited by Guichard et al, 2014",Africa,Eastern Africa,Ethiopia,"Kobo/Metahara, Fantale",39.983,8.912,2004,,,,,,,,
"Baldet as cited by Guichard et al, 2014",Africa,Eastern Africa,Ethiopia,"Mataka, Guewane",40.537,9.965,2004,,,,,,,,
"Baldet as cited by Guichard et al, 2014",Africa,Eastern Africa,Ethiopia,"Gera, Dubti",41.283,11.569,2004,,,,,,,,
Baylis et al 1997,Africa,Northern Africa,Algeria,Amerzgane,-7.146,28.995,1997,,,,,,,,
Baylis et al 1997,Africa,Northern Africa,Morocco,Sablons,-6.743,34.033,1997,,,,,,,,
Baylis et al 1997,Africa,Northern Africa,Morocco,Arbaoua,-5.919,34.917,1997,,,,,,,,
Baylis et al 1997,Africa,Northern Africa,Morocco,Youssoufia,-8.527,32.265,1997,,,,,,,,
Baylis et al 1997,Africa,Northern Africa,Morocco,Sidi Moussa,-5.954,34.107,1997,,,,,,,,
Baylis et al 1997,Africa,Northern Africa,Morocco,Tangier,-5.842,35.779,1997,,,,,,,,
Baylis et al 1997,Africa,Northern Africa,Morocco,M'diq,-5.355,35.702,1997,,,,,,,,
Baylis et al 1997,Africa,Northern Africa,Morocco,Adarouche,-5.55,33.396,1997,,,,,,,,
Baylis et al 1997,Africa,Northern Africa,Morocco,Tissa,-4.778,34.25,1997,,,,,,,,
Baylis et al 1997,Africa,Northern Africa,Morocco,Beni Mellal,-6.393,32.311,1997,,,,,,,,
Baylis et al 1997,Africa,Northern Africa,Morocco,Chefchaouen,-5.311,35.176,1997,,,,,,,,
Baylis et al 1997,Africa,Northern Africa,Morocco,Agadir,-9.567,30.366,1997,,,,,,,,
Baylis et al 1997,Africa,Northern Africa,Morocco,Guercif,-3.348,34.251,1997,,,,,,,,
Baylis et al 1997,Africa,Northern Africa,Morocco,Goulimime,-10.05,28.967,1997,,,,,,,,
Baylis et al 1997,Africa,Northern Africa,Morocco,Oujda,-1.914,34.724,1997,,,,,,,,
Baylis et al 1997,Africa,Northern Africa,Morocco,Berkane,-2.345,34.922,1997,,,,,,,,
Baylis et al 1997,Africa,Northern Africa,Morocco,Marrakech,-8.02,31.619,1997,,,,,,,,
Baylis et al 1997,Africa,Northern Africa,Morocco,Taroudant,-8.857,30.494,1997,,,,,,,,
Baylis et al 1997,Africa,Northern Africa,Morocco,Imzouren,-3.842,35.151,1997,,,,,,,,
Baylis et al 1997,Africa,Northern Africa,Morocco,Bouizakarn,-9.711,29.174,1997,,,,,,,,
Baylis et al 1997,Africa,Northern Africa,Morocco,Errachidia,-4.47,31.97,1997,,,,,,,,
Bellis et al 2014,Asia,Eastern Asia,China,Danzhou,109.57,19.51,2010,,,,,,,,
Blanda et al 2018,Europe,Southern Europe,Italy,C/da Feudott,13.38,37.72,2000-2013,,,,,,,,
Blanda et al 2018,Europe,Southern Europe,Italy,C/da Giardo,13.44,37.75,2000-2013,,,,,,,,
Blanda et al 2018,Europe,Southern Europe,Italy,C/da Alber?,14,37.73,2000-2013,,,,,,,,
Blanda et al 2018,Europe,Southern Europe,Italy,Montoni,14.1,37.73,2000-2013,,,,,,,,
Blanda et al 2018,Europe,Southern Europe,Italy,C/da Gurgo,13.85,37.81,2000-2013,,,,,,,,
Blanda et al 2018,Europe,Southern Europe,Italy,C/da Ficuzz,13.82,37.76,2000-2013,,,,,,,,
Blanda et al 2018,Europe,Southern Europe,Italy,Giardinello,13.43,37.83,2000-2013,,,,,,,,
Blanda et al 2018,Europe,Southern Europe,Italy,S.Pinnoso,13.37,37.79,2000-2013,,,,,,,,
Blanda et al 2018,Europe,Southern Europe,Italy,Bosco Sottan,13.78,37.82,2000-2013,,,,,,,,
Blanda et al 2018,Europe,Southern Europe,Italy,C/da Abbate,14.17,37.82,2000-2013,,,,,,,,
Blanda et al 2018,Europe,Southern Europe,Italy,C/Da Rubina,13.29,37.83,2000-2013,,,,,,,,
Blanda et al 2018,Europe,Southern Europe,Italy,Panicella,13.5,37.76,2000-2013,,,,,,,,
Blanda et al 2018,Europe,Southern Europe,Italy,Balate,13.94,37.79,2000-2013,,,,,,,,
Blanda et al 2018,Europe,Southern Europe,Italy,C/da Bordone,13.72,37.79,2000-2013,,,,,,,,
Blanda et al 2018,Europe,Southern Europe,Italy,C/da Donaleg,14.01,37.78,2000-2013,,,,,,,,
Blanda et al 2018,Europe,Southern Europe,Italy,C/da Mancana,13.62,37.79,2000-2013,,,,,,,,
Blanda et al 2018,Europe,Southern Europe,Italy,Paratore,14.09,37.81,2000-2013,,,,,,,,
Blanda et al 2018,Europe,Southern Europe,Italy,C/da Anduino,13.9,37.9,2000-2013,,,,,,,,
Blanda et al 2018,Europe,Southern Europe,Italy,Pirato,13.58,37.9,2000-2013,,,,,,,,
Blanda et al 2018,Europe,Southern Europe,Italy,C/da Fontana,13.85,37.87,2000-2013,,,,,,,,
Blanda et al 2018,Europe,Southern Europe,Italy,Molino Nuovo,13.56,37.84,2000-2013,,,,,,,,
Blanda et al 2018,Europe,Southern Europe,Italy,Sticca (Rocc,13.15,37.84,2000-2013,,,,,,,,
Blanda et al 2018,Europe,Southern Europe,Italy,C/da Celso,13.26,37.89,2000-2013,,,,,,,,
Blanda et al 2018,Europe,Southern Europe,Italy,Portella di,13.67,37.87,2000-2013,,,,,,,,
Blanda et al 2018,Europe,Southern Europe,Italy,S.Giovanni,13.72,37.9,2000-2013,,,,,,,,
Blanda et al 2018,Europe,Southern Europe,Italy,P.Bonanno Mo,13.34,38.19,2000-2013,,,,,,,,
Blanda et al 2018,Europe,Southern Europe,Italy,Sannita,13.63,37.96,2000-2013,,,,,,,,
Blanda et al 2018,Europe,Southern Europe,Italy,Desisa,13.11,37.95,2000-2013,,,,,,,,
Blanda et al 2018,Europe,Southern Europe,Italy,C/da Travers,13.52,37.99,2000-2013,,,,,,,,
Blanda et al 2018,Europe,Southern Europe,Italy,C/da Timpa A,14.13,38,2000-2013,,,,,,,,
Blanda et al 2018,Europe,Southern Europe,Italy,C/da Armizzo,13.94,37.98,2000-2013,,,,,,,,
Blanda et al 2018,Europe,Southern Europe,Italy,C/da Sovaraz,13.88,37.95,2000-2013,,,,,,,,
Blanda et al 2018,Europe,Southern Europe,Italy,C/da Lanzari,14.04,37.95,2000-2013,,,,,,,,
Blanda et al 2018,Europe,Southern Europe,Italy,Balistreros,13.44,37.98,2000-2013,,,,,,,,
Blanda et al 2018,Europe,Southern Europe,Italy,Quarto,13.53,37.94,2000-2013,,,,,,,,
Blanda et al 2018,Europe,Southern Europe,Italy,Mafanoce,13.31,37.97,2000-2013,,,,,,,,
Blanda et al 2018,Europe,Southern Europe,Italy,C/da  Portel,14.12,37.93,2000-2013,,,,,,,,
Blanda et al 2018,Europe,Southern Europe,Italy,Buonmarito,13.16,37.98,2000-2013,,,,,,,,
Blanda et al 2018,Europe,Southern Europe,Italy,Stallone,13.47,37.94,2000-2013,,,,,,,,
Blanda et al 2018,Europe,Southern Europe,Italy,Loc. Malvell,13.22,37.93,2000-2013,,,,,,,,
Blanda et al 2018,Europe,Southern Europe,Italy,Incorvina,13.51,38.05,2000-2013,,,,,,,,
Blanda et al 2018,Europe,Southern Europe,Italy,Mazzarca,13.42,38.03,2000-2013,,,,,,,,
Blanda et al 2018,Europe,Southern Europe,Italy,C/da Badiott,13.11,38.05,2000-2013,,,,,,,,
Blanda et al 2018,Europe,Southern Europe,Italy,Fontanelle,13.28,38.04,2000-2013,,,,,,,,
Blanda et al 2018,Europe,Southern Europe,Italy,Giulio Cesar,13.45,38.08,2000-2013,,,,,,,,
Blanda et al 2018,Europe,Southern Europe,Italy,Villagrazia,13.33,38.08,2000-2013,,,,,,,,
Blanda et al 2018,Europe,Southern Europe,Italy,Mircene,13.11,38.13,2000-2013,,,,,,,,
Blanda et al 2018,Europe,Southern Europe,Italy,Malpasso,13.18,38.09,2000-2013,,,,,,,,
Blanda et al 2018,Europe,Southern Europe,Italy,Loc. Luparel,13.3,38.12,2000-2013,,,,,,,,
Blanda et al 2018,Europe,Southern Europe,Italy,C/da Cicala,13.05,38.04,2000-2013,,,,,,,,
Blanda et al 2018,Europe,Southern Europe,Italy,C/da Bosco R,14.72,36.75,2000-2013,,,,,,,,
Blanda et al 2018,Europe,Southern Europe,Italy,Loc. Marabin,14.89,36.75,2000-2013,,,,,,,,
Blanda et al 2018,Europe,Southern Europe,Italy,Ciarciolo,14.78,36.72,2000-2013,,,,,,,,
Blanda et al 2018,Europe,Southern Europe,Italy,Timpe Rosse,14.62,36.78,2000-2013,,,,,,,,
Blanda et al 2018,Europe,Southern Europe,Italy,C/da Gilestr,14.75,36.79,2000-2013,,,,,,,,
Blanda et al 2018,Europe,Southern Europe,Italy,Loc.Serramez,14.64,36.83,2000-2013,,,,,,,,
Blanda et al 2018,Europe,Southern Europe,Italy,C/da Modica,14.82,36.81,2000-2013,,,,,,,,
Blanda et al 2018,Europe,Southern Europe,Italy,C/da Stanisl,14.55,36.87,2000-2013,,,,,,,,
Blanda et al 2018,Europe,Southern Europe,Italy,C/da Trisaur,14.6,36.91,2000-2013,,,,,,,,
Blanda et al 2018,Europe,Southern Europe,Italy,Mauto,14.78,36.9,2000-2013,,,,,,,,
Blanda et al 2018,Europe,Southern Europe,Italy,C/da Monsovi,14.72,36.89,2000-2013,,,,,,,,
Blanda et al 2018,Europe,Southern Europe,Italy,C/da Magazzi,14.66,36.88,2000-2013,,,,,,,,
Blanda et al 2018,Europe,Southern Europe,Italy,C/da S. Nico,14.75,36.95,2000-2013,,,,,,,,
Blanda et al 2018,Europe,Southern Europe,Italy,Monteraci,14.67,36.97,2000-2013,,,,,,,,
Blanda et al 2018,Europe,Southern Europe,Italy,Diligenza,14.47,36.97,2000-2013,,,,,,,,
Blanda et al 2018,Europe,Southern Europe,Italy,Rampolo,14.81,36.95,2000-2013,,,,,,,,
Blanda et al 2018,Europe,Southern Europe,Italy,Fondo Monac?,14.54,36.98,2000-2013,,,,,,,,
Blanda et al 2018,Europe,Southern Europe,Italy,Loc. Kennedy,14.7,37.07,2000-2013,,,,,,,,
Blanda et al 2018,Europe,Southern Europe,Italy,Carrubba,14.98,36.75,2000-2013,,,,,,,,
Blanda et al 2018,Europe,Southern Europe,Italy,Stretto,13.02,37.91,2000-2013,,,,,,,,
Blanda et al 2018,Europe,Southern Europe,Italy,Curbici,13.08,37.9,2000-2013,,,,,,,,
Blanda et al 2018,Europe,Southern Europe,Italy,Donna scala,14.78,37.05,2000-2013,,,,,,,,
Blanda et al 2018,Europe,Southern Europe,Italy,Mandralisca,14.21,37.75,2000-2013,,,,,,,,
Blanda et al 2018,Europe,Southern Europe,Italy,Spina Santa,13.92,37.6,2000-2013,,,,,,,,
Blanda et al 2018,Europe,Southern Europe,Italy,Serradella,14.54,37.04,2000-2013,,,,,,,,
Blanda et al 2018,Europe,Southern Europe,Italy,Balatazza,14.84,36.9,2000-2013,,,,,,,,
Blanda et al 2018,Europe,Southern Europe,Italy,C/da Ruta,14.89,36.85,2000-2013,,,,,,,,
Blanda et al 2018,Europe,Southern Europe,Italy,C/da Difeso,14.32,37.88,2000-2013,,,,,,,,
Blanda et al 2018,Europe,Southern Europe,Italy,Pasaniello,14.25,37.84,2000-2013,,,,,,,,
Blanda et al 2018,Europe,Southern Europe,Italy,Loc. Balestr,13.67,37.72,2000-2013,,,,,,,,
Blanda et al 2018,Europe,Southern Europe,Italy,C/da Monte S,14.87,36.99,2000-2013,,,,,,,,
Blanda et al 2018,Europe,Southern Europe,Italy,Pagliarazzi,14.97,36.8,2000-2013,,,,,,,,
Blanda et al 2018,Europe,Southern Europe,Italy,C/da Capostr,14.33,37.78,2000-2013,,,,,,,,
Blanda et al 2018,Europe,Southern Europe,Italy,C/da Fontana,14.48,38.03,2000-2013,,,,,,,,
Blanda et al 2018,Europe,Southern Europe,Italy,Loc. Minissa,15.53,38.16,2000-2013,,,,,,,,
Blanda et al 2018,Europe,Southern Europe,Italy,C.da Messine,15.32,38.19,2000-2013,,,,,,,,
Blanda et al 2018,Europe,Southern Europe,Italy,C/da Masseri,15.26,38.2,2000-2013,,,,,,,,
Blanda et al 2018,Europe,Southern Europe,Italy,C/da Stanzi,14.26,37.69,2000-2013,,,,,,,,
Blanda et al 2018,Europe,Southern Europe,Italy,Loc. Misilan,15.27,37.96,2000-2013,,,,,,,,
Blanda et al 2018,Europe,Southern Europe,Italy,Loc. Roccaro,14.59,37.98,2000-2013,,,,,,,,
Blanda et al 2018,Europe,Southern Europe,Italy,Loreto,14.26,37.95,2000-2013,,,,,,,,
Blanda et al 2018,Europe,Southern Europe,Italy,Noce,14.72,37.93,2000-2013,,,,,,,,
Blanda et al 2018,Europe,Southern Europe,Italy,C/da Samperi,14.48,37.96,2000-2013,,,,,,,,
Blanda et al 2018,Europe,Southern Europe,Italy,Lecco,15.34,37.93,2000-2013,,,,,,,,
Blanda et al 2018,Europe,Southern Europe,Italy,S. Lucia,14.33,37.96,2000-2013,,,,,,,,
Blanda et al 2018,Europe,Southern Europe,Italy,C/da Morizzi,14.39,37.98,2000-2013,,,,,,,,
Blanda et al 2018,Europe,Southern Europe,Italy,Ponte Magaro Pi,14.65,37.96,2000-2013,,,,,,,,
Blanda et al 2018,Europe,Southern Europe,Italy,C/da Cassani,15,37.95,2000-2013,,,,,,,,
Blanda et al 2018,Europe,Southern Europe,Italy,C/da Paluce,15.41,38,2000-2013,,,,,,,,
Blanda et al 2018,Europe,Southern Europe,Italy,Barbuna,15.35,37.99,2000-2013,,,,,,,,
Blanda et al 2018,Europe,Southern Europe,Italy,C.da Balze,14.99,38.07,2000-2013,,,,,,,,
Blanda et al 2018,Europe,Southern Europe,Italy,C/da Marino,14.69,38.02,2000-2013,,,,,,,,
Blanda et al 2018,Europe,Southern Europe,Italy,Nicetta,14.57,38.04,2000-2013,,,,,,,,
Blanda et al 2018,Europe,Southern Europe,Italy,C/da Canalot,15.05,38.06,2000-2013,,,,,,,,
Blanda et al 2018,Europe,Southern Europe,Italy,Cangemi,14.63,38.05,2000-2013,,,,,,,,
Blanda et al 2018,Europe,Southern Europe,Italy,Montagna,15.16,38.06,2000-2013,,,,,,,,
Blanda et al 2018,Europe,Southern Europe,Italy,Serro Tobona,15.02,38.02,2000-2013,,,,,,,,
Blanda et al 2018,Europe,Southern Europe,Italy,Loc.La Valle,15.1,38.01,2000-2013,,,,,,,,
Blanda et al 2018,Europe,Southern Europe,Italy,Piano Campo,14.88,38.02,2000-2013,,,,,,,,
Blanda et al 2018,Europe,Southern Europe,Italy,C/da Piano D,14.95,38.02,2000-2013,,,,,,,,
Blanda et al 2018,Europe,Southern Europe,Italy,Loc.Acqua Vena,14.84,38.06,2000-2013,,,,,,,,
Blanda et al 2018,Europe,Southern Europe,Italy,Liparoto fon,14.92,38.06,2000-2013,,,,,,,,
Blanda et al 2018,Europe,Southern Europe,Italy,,14.78,38.02,2000-2013,,,,,,,,
Blanda et al 2018,Europe,Southern Europe,Italy,Porticella,14.99,38.12,2000-2013,,,,,,,,
Blanda et al 2018,Europe,Southern Europe,Italy,Praga,15.15,38.12,2000-2013,,,,,,,,
Blanda et al 2018,Europe,Southern Europe,Italy,Gorna,14.79,38.09,2000-2013,,,,,,,,
Blanda et al 2018,Europe,Southern Europe,Italy,Via Verga 21,15.08,38.1,2000-2013,,,,,,,,
Blanda et al 2018,Europe,Southern Europe,Italy,Laganeto,14.71,38.1,2000-2013,,,,,,,,
Blanda et al 2018,Europe,Southern Europe,Italy,S.Ignazio Pilat,14.9,38.16,2000-2013,,,,,,,,
Blanda et al 2018,Europe,Southern Europe,Italy,Via Fondaco,15.21,38.14,2000-2013,,,,,,,,
Blanda et al 2018,Europe,Southern Europe,Italy,Contura,14.89,38.11,2000-2013,,,,,,,,
Blanda et al 2018,Europe,Southern Europe,Italy,Fondacarso d,15.27,38.13,2000-2013,,,,,,,,
Blanda et al 2018,Europe,Southern Europe,Italy,Zio Pelano,14.79,38.14,2000-2013,,,,,,,,
Blanda et al 2018,Europe,Southern Europe,Italy,Mili S.Pietr,15.49,38.12,2000-2013,,,,,,,,
Blanda et al 2018,Europe,Southern Europe,Italy,Melia,15.36,38.12,2000-2013,,,,,,,,
Blanda et al 2018,Europe,Southern Europe,Italy,Quattropani,14.92,38.5,2000-2013,,,,,,,,
Blanda et al 2018,Europe,Southern Europe,Italy,Loc. Indoro,15.43,38.23,2000-2013,,,,,,,,
Blanda et al 2018,Europe,Southern Europe,Italy,Torrente tra,15.54,38.21,2000-2013,,,,,,,,
Blanda et al 2018,Europe,Southern Europe,Italy,C/da Tono,15.55,38.27,2000-2013,,,,,,,,
Blanda et al 2018,Europe,Southern Europe,Italy,C/da Birruso,14.47,37.85,2000-2013,,,,,,,,
Blanda et al 2018,Europe,Southern Europe,Italy,C/da Bosco C,14.69,37.86,2000-2013,,,,,,,,
Blanda et al 2018,Europe,Southern Europe,Italy,C/da S.Giova,14.39,37.86,2000-2013,,,,,,,,
Blanda et al 2018,Europe,Southern Europe,Italy,C/da Baf?',14.4,37.91,2000-2013,,,,,,,,
Blanda et al 2018,Europe,Southern Europe,Italy,Vitalone,14.57,37.91,2000-2013,,,,,,,,
Blanda et al 2018,Europe,Southern Europe,Italy,C/da Scalona,14.64,37.82,2000-2013,,,,,,,,
Blanda et al 2018,Europe,Southern Europe,Italy,Loc. Gargo,14.44,37.81,2000-2013,,,,,,,,
Blanda et al 2018,Europe,Southern Europe,Italy,C/da Casale,14.48,37.77,2000-2013,,,,,,,,
Blanda et al 2018,Europe,Southern Europe,Italy,Dagara,14.83,37.97,2000-2013,,,,,,,,
Blanda et al 2018,Europe,Southern Europe,Italy,C/da Mangala,14.77,37.96,2000-2013,,,,,,,,
Blanda et al 2018,Europe,Southern Europe,Italy,C/da Mangone,14.35,37.38,2000-2013,,,,,,,,
Blanda et al 2018,Europe,Southern Europe,Italy,C/da S.Bart,14.43,37.46,2000-2013,,,,,,,,
Blanda et al 2018,Europe,Southern Europe,Italy,Grottacalda,14.35,37.47,2000-2013,,,,,,,,
Blanda et al 2018,Europe,Southern Europe,Italy,C/da Kamuth,14.27,37.47,2000-2013,,,,,,,,
Blanda et al 2018,Europe,Southern Europe,Italy,C/da Pizzuto,14.18,37.54,2000-2013,,,,,,,,
Blanda et al 2018,Europe,Southern Europe,Italy,C/da Dainama,14.42,37.52,2000-2013,,,,,,,,
Blanda et al 2018,Europe,Southern Europe,Italy,Torre,14.27,37.53,2000-2013,,,,,,,,
Blanda et al 2018,Europe,Southern Europe,Italy,C/da Girgia,14.35,37.54,2000-2013,,,,,,,,
Blanda et al 2018,Europe,Southern Europe,Italy,Salito,14.58,37.65,2000-2013,,,,,,,,
Blanda et al 2018,Europe,Southern Europe,Italy,C/da Croce,14.44,37.66,2000-2013,,,,,,,,
Blanda et al 2018,Europe,Southern Europe,Italy,C/da Sperone,14.4,37.59,2000-2013,,,,,,,,
Blanda et al 2018,Europe,Southern Europe,Italy,C/da Pantane,14.26,37.6,2000-2013,,,,,,,,
Blanda et al 2018,Europe,Southern Europe,Italy,Girgia,14.33,37.59,2000-2013,,,,,,,,
Blanda et al 2018,Europe,Southern Europe,Italy,Salito,14.49,37.59,2000-2013,,,,,,,,
Blanda et al 2018,Europe,Southern Europe,Italy,Serrone,14.52,37.66,2000-2013,,,,,,,,
Blanda et al 2018,Europe,Southern Europe,Italy,C/da Turricc,14.61,37.59,2000-2013,,,,,,,,
Blanda et al 2018,Europe,Southern Europe,Italy,C/da Pontice,14.67,37.61,2000-2013,,,,,,,,
Blanda et al 2018,Europe,Southern Europe,Italy,C/da Mannia,14.56,37.82,2000-2013,,,,,,,,
Blanda et al 2018,Europe,Southern Europe,Italy,Casuto,14.34,37.68,2000-2013,,,,,,,,
Blanda et al 2018,Europe,Southern Europe,Italy,C/da Roccasc,14.37,37.72,2000-2013,,,,,,,,
Blanda et al 2018,Europe,Southern Europe,Italy,Loc. Bonfigl,14.54,37.75,2000-2013,,,,,,,,
Blanda et al 2018,Europe,Southern Europe,Italy,C/da Colla,14.65,37.68,2000-2013,,,,,,,,
Blanda et al 2018,Europe,Southern Europe,Italy,Pi? Marino,14.39,37.77,2000-2013,,,,,,,,
Blanda et al 2018,Europe,Southern Europe,Italy,C/da Torre d,14.32,37.34,2000-2013,,,,,,,,
Blanda et al 2018,Europe,Southern Europe,Italy,C/da Ralbiat,14.28,37.38,2000-2013,,,,,,,,
Blanda et al 2018,Europe,Southern Europe,Italy,Loc. Ginestr,14.48,37.41,2000-2013,,,,,,,,
Blanda et al 2018,Europe,Southern Europe,Italy,Acquasanta,14.87,37.93,2000-2013,,,,,,,,
Blanda et al 2018,Europe,Southern Europe,Italy,C/da Irianni,14.7,37.81,2000-2013,,,,,,,,
Blanda et al 2018,Europe,Southern Europe,Italy,C/da Rinello,14.13,37.41,2000-2013,,,,,,,,
Blanda et al 2018,Europe,Southern Europe,Italy,C/da Ginestr,14.18,37.37,2000-2013,,,,,,,,
Blanda et al 2018,Europe,Southern Europe,Italy,Montagna,14.79,37.1,2000-2013,,,,,,,,
Blanda et al 2018,Europe,Southern Europe,Italy,C/da,14.75,37.65,2000-2013,,,,,,,,
Blanda et al 2018,Europe,Southern Europe,Italy,C/da Poggio,14.81,37.66,2000-2013,,,,,,,,
Blanda et al 2018,Europe,Southern Europe,Italy,Porcello,14.7,37.73,2000-2013,,,,,,,,
Blanda et al 2018,Europe,Southern Europe,Italy,C/da Fontana,14.88,37.05,2000-2013,,,,,,,,
Blanda et al 2018,Europe,Southern Europe,Italy,C/da Grado,14.55,37.58,2000-2013,,,,,,,,
Blanda et al 2018,Europe,Southern Europe,Italy,C/da Giresi,14.53,37.44,2000-2013,,,,,,,,
Blanda et al 2018,Europe,Southern Europe,Italy,Madre Rosse,14.59,37.53,2000-2013,,,,,,,,
Blanda et al 2018,Europe,Southern Europe,Italy,Cuba,14.72,37.57,2000-2013,,,,,,,,
Blanda et al 2018,Europe,Southern Europe,Italy,Bellona,14.74,37.52,2000-2013,,,,,,,,
Blanda et al 2018,Europe,Southern Europe,Italy,Gisira,14.98,36.85,2000-2013,,,,,,,,
Blanda et al 2018,Europe,Southern Europe,Italy,C/da Gulfo L,13.75,37.72,2000-2013,,,,,,,,
Blanda et al 2018,Europe,Southern Europe,Italy,Saffuti,13.25,37.64,2000-2013,,,,,,,,
Blanda et al 2018,Europe,Southern Europe,Italy,Garella,13.28,37.6,2000-2013,,,,,,,,
Blanda et al 2018,Europe,Southern Europe,Italy,Semantile,14.76,37.88,2000-2013,,,,,,,,
Blanda et al 2018,Europe,Southern Europe,Italy,Piazza Lotte,14.82,37.87,2000-2013,,,,,,,,
Blanda et al 2018,Europe,Southern Europe,Italy,Rametta,13.03,37.68,2000-2013,,,,,,,,
Blanda et al 2018,Europe,Southern Europe,Italy,Ullica,15.16,37.9,2000-2013,,,,,,,,
Blanda et al 2018,Europe,Southern Europe,Italy,C/da Pietra,15.08,37.89,2000-2013,,,,,,,,
Blanda et al 2018,Europe,Southern Europe,Italy,Zisola,14.96,36.97,2000-2013,,,,,,,,
Blanda et al 2018,Europe,Southern Europe,Italy,Lettiera,15.11,36.73,2000-2013,,,,,,,,
Blanda et al 2018,Europe,Southern Europe,Italy,C/da Melia,13.56,37.66,2000-2013,,,,,,,,
Blanda et al 2018,Europe,Southern Europe,Italy,Puntara,15.08,36.68,2000-2013,,,,,,,,
Blanda et al 2018,Europe,Southern Europe,Italy,Terrauzza,15.31,37.02,2000-2013,,,,,,,,
Blanda et al 2018,Europe,Southern Europe,Italy,Loc. Vendica,15.08,36.8,2000-2013,,,,,,,,
Blanda et al 2018,Europe,Southern Europe,Italy,Scala Greca,15.27,37.09,2000-2013,,,,,,,,
Blanda et al 2018,Europe,Southern Europe,Italy,Loc. Zisola,15.04,36.86,2000-2013,,,,,,,,
Blanda et al 2018,Europe,Southern Europe,Italy,Belluria,15,36.9,2000-2013,,,,,,,,
Blanda et al 2018,Europe,Southern Europe,Italy,Villa Vela,15.04,36.95,2000-2013,,,,,,,,
Blanda et al 2018,Europe,Southern Europe,Italy,C/da Stradic,15.18,36.97,2000-2013,,,,,,,,
Blanda et al 2018,Europe,Southern Europe,Italy,C/da Passo L,14.99,37.03,2000-2013,,,,,,,,
Blanda et al 2018,Europe,Southern Europe,Italy,Frescura,15.19,37.07,2000-2013,,,,,,,,
Blanda et al 2018,Europe,Southern Europe,Italy,C/da Coppo P,15.23,37.03,2000-2013,,,,,,,,
Blanda et al 2018,Europe,Southern Europe,Italy,Fagotto-Grot,15.12,37.06,2000-2013,,,,,,,,
Blanda et al 2018,Europe,Southern Europe,Italy,Masca',14.96,37.1,2000-2013,,,,,,,,
Blanda et al 2018,Europe,Southern Europe,Italy,C/da Morghel,15.13,37.12,2000-2013,,,,,,,,
Blanda et al 2018,Europe,Southern Europe,Italy,Favarotta,14.94,37.2,2000-2013,,,,,,,,
Blanda et al 2018,Europe,Southern Europe,Italy,C/da San Gi,15.13,37.17,2000-2013,,,,,,,,
Blanda et al 2018,Europe,Southern Europe,Italy,C/da Ogliast,15.13,37.24,2000-2013,,,,,,,,
Blanda et al 2018,Europe,Southern Europe,Italy,Favara,15,37.19,2000-2013,,,,,,,,
Blanda et al 2018,Europe,Southern Europe,Italy,San Domenico,15.08,37.27,2000-2013,,,,,,,,
Blanda et al 2018,Europe,Southern Europe,Italy,C/da Guardar,14.95,37.29,2000-2013,,,,,,,,
Blanda et al 2018,Europe,Southern Europe,Italy,C/da Sciri C,14.63,37.14,2000-2013,,,,,,,,
Blanda et al 2018,Europe,Southern Europe,Italy,Digacastello,13.41,37.58,2000-2013,,,,,,,,
Blanda et al 2018,Europe,Southern Europe,Italy,Ferraria,13.41,37.52,2000-2013,,,,,,,,
Blanda et al 2018,Europe,Southern Europe,Italy,C/da Erbe Bi,14.8,37.8,2000-2013,,,,,,,,
Blanda et al 2018,Europe,Southern Europe,Italy,Sigonella,14.89,37.4,2000-2013,,,,,,,,
Blanda et al 2018,Europe,Southern Europe,Italy,C/da Cuccume,14.93,37.36,2000-2013,,,,,,,,
Blanda et al 2018,Europe,Southern Europe,Italy,Ficuzza,14.63,37.48,2000-2013,,,,,,,,
Blanda et al 2018,Europe,Southern Europe,Italy,Inpernate,14.66,37.44,2000-2013,,,,,,,,
Blanda et al 2018,Europe,Southern Europe,Italy,Fagotto,14.97,37.91,2000-2013,,,,,,,,
Blanda et al 2018,Europe,Southern Europe,Italy,Gulfi-Randaz,14.12,37.47,2000-2013,,,,,,,,
Blanda et al 2018,Europe,Southern Europe,Italy,Interrata,15.06,37.34,2000-2013,,,,,,,,
Blanda et al 2018,Europe,Southern Europe,Italy,Torrazza,15.05,37.41,2000-2013,,,,,,,,
Blanda et al 2018,Europe,Southern Europe,Italy,C Da Poggio,14.76,37.17,2000-2013,,,,,,,,
Blanda et al 2018,Europe,Southern Europe,Italy,Nocifora,14.76,37.22,2000-2013,,,,,,,,
Blanda et al 2018,Europe,Southern Europe,Italy,C/da Cotugno,14.82,37.21,2000-2013,,,,,,,,
Blanda et al 2018,Europe,Southern Europe,Italy,Montagna,14.52,37.26,2000-2013,,,,,,,,
Blanda et al 2018,Europe,Southern Europe,Italy,S. Felice,14.81,37.26,2000-2013,,,,,,,,
Blanda et al 2018,Europe,Southern Europe,Italy,Pietrazze,14.77,37.33,2000-2013,,,,,,,,
Blanda et al 2018,Europe,Southern Europe,Italy,C/da Giotto,15.21,37.81,2000-2013,,,,,,,,
Blanda et al 2018,Europe,Southern Europe,Italy,Loc. Elsa,14.39,37.3,2000-2013,,,,,,,,
Blanda et al 2018,Europe,Southern Europe,Italy,C/da Ovo,14.8,37.4,2000-2013,,,,,,,,
Blanda et al 2018,Europe,Southern Europe,Italy,Loc. Albanel,14.53,37.14,2000-2013,,,,,,,,
Blanda et al 2018,Europe,Southern Europe,Italy,,14.65,37.28,2000-2013,,,,,,,,
Blanda et al 2018,Europe,Southern Europe,Italy,C/da Borgo T,14.73,37.27,2000-2013,,,,,,,,
Blanda et al 2018,Europe,Southern Europe,Italy,Terre Bianch,14.98,37.47,2000-2013,,,,,,,,
Blanda et al 2018,Europe,Southern Europe,Italy,C/da M;addal,14.92,37.44,2000-2013,,,,,,,,
Blanda et al 2018,Europe,Southern Europe,Italy,Fondo Corvai,15.05,37.46,2000-2013,,,,,,,,
Blanda et al 2018,Europe,Southern Europe,Italy,C/da Maniace,14.88,37.5,2000-2013,,,,,,,,
Blanda et al 2018,Europe,Southern Europe,Italy,Cangiatore,14.95,37.53,2000-2013,,,,,,,,
Blanda et al 2018,Europe,Southern Europe,Italy,Cardillo,15.02,37.53,2000-2013,,,,,,,,
Blanda et al 2018,Europe,Southern Europe,Italy,C/da Patelli,14.92,37.58,2000-2013,,,,,,,,
Blanda et al 2018,Europe,Southern Europe,Italy,C/da S.Agata,14.85,37.54,2000-2013,,,,,,,,
Blanda et al 2018,Europe,Southern Europe,Italy,Gattaino,14.98,37.59,2000-2013,,,,,,,,
Blanda et al 2018,Europe,Southern Europe,Italy,Loc. Picardo,14.87,37.65,2000-2013,,,,,,,,
Blanda et al 2018,Europe,Southern Europe,Italy,C/da Rinazze,14.84,37.61,2000-2013,,,,,,,,
Blanda et al 2018,Europe,Southern Europe,Italy,Loc. Salto C,14.91,37.71,2000-2013,,,,,,,,
Blanda et al 2018,Europe,Southern Europe,Italy,Macchia,15.16,37.72,2000-2013,,,,,,,,
Blanda et al 2018,Europe,Southern Europe,Italy,C/da Chiusa,15.15,37.82,2000-2013,,,,,,,,
Blanda et al 2018,Europe,Southern Europe,Italy,C/da Setteni,14.87,37.81,2000-2013,,,,,,,,
Blanda et al 2018,Europe,Southern Europe,Italy,C/da Gurrida,14.91,37.87,2000-2013,,,,,,,,
Blanda et al 2018,Europe,Southern Europe,Italy,C/da Cammaut,13.19,37.62,2000-2013,,,,,,,,
Blanda et al 2018,Europe,Southern Europe,Italy,Loc. Valle F,14.47,37.18,2000-2013,,,,,,,,
Blanda et al 2018,Europe,Southern Europe,Italy,S.Matteo,13.42,37.63,2000-2013,,,,,,,,
Blanda et al 2018,Europe,Southern Europe,Italy,Cusimano,13.02,37.76,2000-2013,,,,,,,,
Blanda et al 2018,Europe,Southern Europe,Italy,Piana Vizz?,13.3,37.4,2000-2013,,,,,,,,
Blanda et al 2018,Europe,Southern Europe,Italy,Concaginisi,13.9,37.14,2000-2013,,,,,,,,
Blanda et al 2018,Europe,Southern Europe,Italy,Loc.Ficuzza,13.89,37.21,2000-2013,,,,,,,,
Blanda et al 2018,Europe,Southern Europe,Italy,C/da Battagl,13.77,37.33,2000-2013,,,,,,,,
Blanda et al 2018,Europe,Southern Europe,Italy,Mos?,13.62,37.28,2000-2013,,,,,,,,
Blanda et al 2018,Europe,Southern Europe,Italy,Inficherna,13.53,37.31,2000-2013,,,,,,,,
Blanda et al 2018,Europe,Southern Europe,Italy,Loc. Aria Lo,13.81,37.27,2000-2013,,,,,,,,
Blanda et al 2018,Europe,Southern Europe,Italy,Senia,13.39,37.35,2000-2013,,,,,,,,
Blanda et al 2018,Europe,Southern Europe,Italy,Pitra Rossa,13.51,37.39,2000-2013,,,,,,,,
Blanda et al 2018,Europe,Southern Europe,Italy,Caldari,13.64,37.38,2000-2013,,,,,,,,
Blanda et al 2018,Europe,Southern Europe,Italy,Gulfa,13.28,37.49,2000-2013,,,,,,,,
Blanda et al 2018,Europe,Southern Europe,Italy,Mendola,13.45,37.44,2000-2013,,,,,,,,
Blanda et al 2018,Europe,Southern Europe,Italy,C/da San Mar,13.56,37.42,2000-2013,,,,,,,,
Blanda et al 2018,Europe,Southern Europe,Italy,Loc. Bordea,13.06,37.55,2000-2013,,,,,,,,
Blanda et al 2018,Europe,Southern Europe,Italy,Gialdonieri,13.54,37.55,2000-2013,,,,,,,,
Blanda et al 2018,Europe,Southern Europe,Italy,Salina,13.33,37.55,2000-2013,,,,,,,,
Blanda et al 2018,Europe,Southern Europe,Italy,C/da Corvo,13.16,37.58,2000-2013,,,,,,,,
Blanda et al 2018,Europe,Southern Europe,Italy,Spagnolo,13.06,37.6,2000-2013,,,,,,,,
Blanda et al 2018,Europe,Southern Europe,Italy,Loc. Gurca M,12.92,37.61,2000-2013,,,,,,,,
Blanda et al 2018,Europe,Southern Europe,Italy,C/da Salto D,13.61,37.46,2000-2013,,,,,,,,
Blanda et al 2018,Europe,Southern Europe,Italy,Loc. S. Cate,13.69,37.64,2000-2013,,,,,,,,
Blanda et al 2018,Europe,Southern Europe,Italy,Brigadieci,14.26,37.28,2000-2013,,,,,,,,
Blanda et al 2018,Europe,Southern Europe,Italy,C/da Tre Fon,13.89,37.35,2000-2013,,,,,,,,
Blanda et al 2018,Europe,Southern Europe,Italy,C/da Tre Fon,13.79,37.61,2000-2013,,,,,,,,
Blanda et al 2018,Europe,Southern Europe,Italy,Monte Grappa,13.72,37.47,2000-2013,,,,,,,,
Blanda et al 2018,Europe,Southern Europe,Italy,Loc. Frandie,13.78,37.43,2000-2013,,,,,,,,
Blanda et al 2018,Europe,Southern Europe,Italy,Caldea,13.72,37.56,2000-2013,,,,,,,,
Blanda et al 2018,Europe,Southern Europe,Italy,Cipolla,14.13,37.32,2000-2013,,,,,,,,
Blanda et al 2018,Europe,Southern Europe,Italy,C/da Buffi,14.19,37.31,2000-2013,,,,,,,,
Blanda et al 2018,Europe,Southern Europe,Italy,C/da Gibilga,14.03,37.47,2000-2013,,,,,,,,
Blanda et al 2018,Europe,Southern Europe,Italy,C/da S.Pietr,14.06,37.17,2000-2013,,,,,,,,
Blanda et al 2018,Europe,Southern Europe,Italy,Gazzana,13.89,37.46,2000-2013,,,,,,,,
Blanda et al 2018,Europe,Southern Europe,Italy,Roccazzelli,14.18,37.1,2000-2013,,,,,,,,
Blanda et al 2018,Europe,Southern Europe,Italy,Tenutella,14.15,37.15,2000-2013,,,,,,,,
Blanda et al 2018,Europe,Southern Europe,Italy,C/da Piano M,14.27,37.13,2000-2013,,,,,,,,
Blanda et al 2018,Europe,Southern Europe,Italy,S.Nicola,14.21,37.15,2000-2013,,,,,,,,
Blanda et al 2018,Europe,Southern Europe,Italy,Vascellerio,14.4,37.15,2000-2013,,,,,,,,
Blanda et al 2018,Europe,Southern Europe,Italy,San Giacomo,14.17,37.24,2000-2013,,,,,,,,
Blanda et al 2018,Europe,Southern Europe,Italy,Garrasia,14.32,37.2,2000-2013,,,,,,,,
Blanda et al 2018,Europe,Southern Europe,Italy,Gebbia rossa,13.95,37.34,2000-2013,,,,,,,,
Blanda et al 2018,Europe,Southern Europe,Italy,Ramilia,13.97,37.4,2000-2013,,,,,,,,
Blanda et al 2018,Europe,Southern Europe,Italy,C/da Mustici,13.99,37.55,2000-2013,,,,,,,,
Blanda et al 2018,Europe,Southern Europe,Italy,Borgo Petili,14.06,37.54,2000-2013,,,,,,,,
Blanda et al 2018,Europe,Southern Europe,Italy,C/da Garcia,12.95,37.78,2000-2013,,,,,,,,
Blanda et al 2018,Europe,Southern Europe,Italy,C/da Birgi,12.48,37.9,2000-2013,,,,,,,,
Blanda et al 2018,Europe,Southern Europe,Italy,S.Nicola,12.63,37.62,2000-2013,,,,,,,,
Blanda et al 2018,Europe,Southern Europe,Italy,S.Teresa,12.83,37.64,2000-2013,,,,,,,,
Blanda et al 2018,Europe,Southern Europe,Italy,Mazzara,12.77,37.62,2000-2013,,,,,,,,
Blanda et al 2018,Europe,Southern Europe,Italy,Munneno,12.68,37.74,2000-2013,,,,,,,,
Blanda et al 2018,Europe,Southern Europe,Italy,Loc. Buturro,12.8,37.75,2000-2013,,,,,,,,
Blanda et al 2018,Europe,Southern Europe,Italy,C/da Serroni,12.59,37.67,2000-2013,,,,,,,,
Blanda et al 2018,Europe,Southern Europe,Italy,Loc. Strasat,12.51,37.73,2000-2013,,,,,,,,
Blanda et al 2018,Europe,Southern Europe,Italy,C/da Torrett,12.75,37.8,2000-2013,,,,,,,,
Blanda et al 2018,Europe,Southern Europe,Italy,Baglio Chita,12.64,37.81,2000-2013,,,,,,,,
Blanda et al 2018,Europe,Southern Europe,Italy,C/da Baronia,12.86,37.82,2000-2013,,,,,,,,
Blanda et al 2018,Europe,Southern Europe,Italy,C/da Ponte F,12.5,37.78,2000-2013,,,,,,,,
Blanda et al 2018,Europe,Southern Europe,Italy,Granatello,12.56,37.76,2000-2013,,,,,,,,
Blanda et al 2018,Europe,Southern Europe,Italy,Fiume Lungo,12.8,37.83,2000-2013,,,,,,,,
Blanda et al 2018,Europe,Southern Europe,Italy,Purgatorio,12.71,38.09,2000-2013,,,,,,,,
Blanda et al 2018,Europe,Southern Europe,Italy,C/da Badessa,12.55,37.87,2000-2013,,,,,,,,
Blanda et al 2018,Europe,Southern Europe,Italy,C/da Sasi,12.91,37.9,2000-2013,,,,,,,,
Blanda et al 2018,Europe,Southern Europe,Italy,Sciarra,12.7,37.9,2000-2013,,,,,,,,
Blanda et al 2018,Europe,Southern Europe,Italy,Bennardo,12.82,37.91,2000-2013,,,,,,,,
Blanda et al 2018,Europe,Southern Europe,Italy,Cuddia,12.64,37.87,2000-2013,,,,,,,,
Blanda et al 2018,Europe,Southern Europe,Italy,C/da Agghiar,12.76,37.88,2000-2013,,,,,,,,
Blanda et al 2018,Europe,Southern Europe,Italy,C/da Xiggiar,12.62,37.92,2000-2013,,,,,,,,
Blanda et al 2018,Europe,Southern Europe,Italy,Ponte Valder,12.53,37.97,2000-2013,,,,,,,,
Blanda et al 2018,Europe,Southern Europe,Italy,Napola,12.62,38,2000-2013,,,,,,,,
Blanda et al 2018,Europe,Southern Europe,Italy,Via Marcanzo,12.56,37.92,2000-2013,,,,,,,,
Blanda et al 2018,Europe,Southern Europe,Italy,Inici,12.83,37.99,2000-2013,,,,,,,,
Blanda et al 2018,Europe,Southern Europe,Italy,C/da Cavasen,12.93,38,2000-2013,,,,,,,,
Blanda et al 2018,Europe,Southern Europe,Italy,C/da Pietral,12.98,37.97,2000-2013,,,,,,,,
Blanda et al 2018,Europe,Southern Europe,Italy,C/da Baglio,12.68,37.96,2000-2013,,,,,,,,
Blanda et al 2018,Europe,Southern Europe,Italy,Buonriposo,12.83,38.05,2000-2013,,,,,,,,
Blanda et al 2018,Europe,Southern Europe,Italy,C/da Bonagia,12.6,38.06,2000-2013,,,,,,,,
Blanda et al 2018,Europe,Southern Europe,Italy,Battaglia,12.73,38.01,2000-2013,,,,,,,,
Blanda et al 2018,Europe,Southern Europe,Italy,C/da Gianboi,12.67,38.03,2000-2013,,,,,,,,
Blanda et al 2018,Europe,Southern Europe,Italy,Borrania,12.56,38.01,2000-2013,,,,,,,,
Boorman 1989,Asia,Western Asia,Bahrain,West Rifa,50.55,26.117,1989,,,,,,,,
Boorman 1989,Asia,Western Asia,Oman,Rumais,58,23.7,1989,,,,,,,,
Boorman 1989,Asia,Western Asia,Yemen,San'a,44.2,15.383,1989,,,,,,,,
Boorman 1989,Asia,Western Asia,Yemen,Al Hudaydah (Garabi Farm),43.2,14.8,1989,,,,,,,,
Boorman 1989,Asia,Western Asia,Yemen,Dhamar,44.383,14.767,1989,,,,,,,,
Boorman 1989,Asia,Western Asia,Yemen,Amran,43.933,15.833,1989,,,,,,,,
Boorman and Mellor 1992,Africa,Eastern Africa,Mauritius,Palmar,57.433,-20.283,1992,,,,,,,,
Boorman and van Harten 1992,Africa,Western Africa,Cape Verde,Sao Jorge dos Orgaos,-23.605,15.055,1992,,,,,,,,
Boorman and Wilkinson1983,Europe,Southern Europe,Greece,Lesbos Island,26.267,39.15,1982,,,,,,,,
Braverman 1988,Asia,Western Asia,Israel,Kannot,34.752,31.802,1988,,,,,,,,
Braverman and Linley 1993,Asia,Western Asia,Israel,Bet Alfa,35.433,32.517,1993,,,,,,,,
Braverman and Phelps 1981,Africa,Eastern Africa,Zimbabwe,Borrowdale racecourse stables,31.083,-17.783,1981,,,,,,,,
Braverman and Phelps 1981,Africa,Eastern Africa,Zimbabwe,Holmewood farm,31.183,-17.733,1981,,,,,,,,
Braverman and Phelps 1981,Africa,Eastern Africa,Zimbabwe,Pig industry board experimental station,31.25,-16.267,1981,,,,,,,,
Braverman and Phelps 1981,Africa,Eastern Africa,Zimbabwe,Moonrakers farm,30.783,-17.65,1981,,,,,,,,
Braverman and Phelps 1981,Africa,Eastern Africa,Zimbabwe,Mount Hampden,30.917,-17.75,1981,,,,,,,,
Braverman et al 1976,Asia,Western Asia,Israel,Bet Dagan,34.817,31.983,1976,,,,,,,,
Braverman et al 1976,Asia,Western Asia,Israel,Einat,34.933,32.1,1976,,,,,,,,
Braverman et al 1976,Asia,Western Asia,Israel,Giv?at Hayyim,34.933,32.4,1976,,,,,,,,
Braverman et al 1976,Asia,Western Asia,Israel,Yesodot,34.867,31.817,1976,,,,,,,,
Braverman et al 1976,Asia,Western Asia,Israel,Devora,35.267,32.533,1976,,,,,,,,
Braverman et al 1976,Asia,Western Asia,Israel,Sarid,35.217,32.667,1976,,,,,,,,
Braverman et al 1976,Asia,Western Asia,Israel,Ganei Yehuda,34.833,32.033,1976,,,,,,,,
Braverman et al 1976,Asia,Western Asia,Israel,Gilat,34.633,31.333,1976,,,,,,,,
Braverman et al 2001,Asia,Western Asia,Israel,"Ein Kerem, Judean Hills",35.167,31.767,1978,,,,,,,,
Braverman et al 2001,Asia,Western Asia,Israel,"Beit Jann, Upper Galilee",35.367,32.967,1981,,,,,,,,
Cagienard et al 2006,Europe,Southern Europe,Italy,Muzzano,8.533,46,2003,,,,,,,,
"Callot as cited by Guichard et al., 2014",Africa,Middle Africa,Cameroon,Kumba,9.45,4.633,1965,,,,,,,,
Capela et al 1993,Europe,Southern Europe,Portugal,Figueira dos Cavaleiros,-8.2,38.1,1993,,,,,,,,
Capela et al 1993,Europe,Southern Europe,Portugal,S Matias,-7.933,38.117,1993,,,,,,,,
Capela et al 1993,Europe,Southern Europe,Portugal,Cheires,-7.483,41.283,1993,,,,,,,,
Capela et al 1993,Europe,Southern Europe,Portugal,Corte Pinto,-7.467,37.7,1993,,,,,,,,
Capela et al 1993,Europe,Southern Europe,Portugal,Alcaria,-7.467,37.333,1993,,,,,,,,
Capela et al 1993,Europe,Southern Europe,Portugal,Freixo de Espada a Cinta,-6.8,41.083,1993,,,,,,,,
Capela et al 2003,Europe,Southern Europe,Portugal,Alter do Chao,-7.692,39.225,2003,,,,,,,,
Capela et al 2003,Europe,Southern Europe,Portugal,Barbacena,-7.294,38.969,2003,,,,,,,,
Capela et al 2003,Europe,Southern Europe,Portugal,Golega,-8.533,39.375,2003,,,,,,,,
Capela et al 2003,Europe,Southern Europe,Portugal,Brejos de Azeitao,-9.056,38.542,2003,,,,,,,,
Capela et al 2003,Europe,Southern Europe,Portugal,Segura,-6.983,39.817,2003,,,,,,,,
Capela et al 2003,Europe,Southern Europe,Portugal,Perdrogao,-8.317,38.767,2003,,,,,,,,
Capela et al 2003,Europe,Southern Europe,Portugal,Serpab,-7.483,38.089,2003,,,,,,,,
Capela et al 2003,Europe,Southern Europe,Portugal,Coruche,-8.569,38.931,2003,,,,,,,,
Capela et al 2003,Europe,Southern Europe,Portugal,Viana Alentejo,-8.072,38.375,2003,,,,,,,,
Capela et al 2003,Europe,Southern Europe,Portugal,Evosa,-7.95,38.533,2003,,,,,,,,
Capela et al 2003,Europe,Southern Europe,Portugal,Mourao,-7.311,38.381,2003,,,,,,,,
Capela et al 2003,Europe,Southern Europe,Portugal,Monfortinho,-6.917,39.958,2003,,,,,,,,
Capela et al 2003,Europe,Southern Europe,Portugal,Silves,-8.442,37.206,2003,,,,,,,,
Capela et al 2003,Europe,Southern Europe,Portugal,Odemira,-8.767,37.672,2003,,,,,,,,
Capela et al 2003,Europe,Southern Europe,Portugal,Monforte,-7.469,39.083,2003,,,,,,,,
Capela et al 2003,Europe,Southern Europe,Portugal,Almeirim,-8.631,39.225,2003,,,,,,,,
Capela et al 2003,Europe,Southern Europe,Portugal,Vila Velho de Rodao,-7.636,39.661,2003,,,,,,,,
Capela et al 2003,Europe,Southern Europe,Portugal,Vouga,-8.45,40.567,2003,,,,,,,,
Capela et al 2003,Europe,Southern Europe,Portugal,Melides,-8.719,38.153,2003,,,,,,,,
Capela et al 2003,Europe,Southern Europe,Portugal,Almodo ver,-8.036,37.489,2003,,,,,,,,
Capela et al 2003,Europe,Southern Europe,Portugal,Beijos,-7.956,40.517,2003,,,,,,,,
Capela et al 2003,Europe,Southern Europe,Portugal,Salsas,-6.825,41.644,2003,,,,,,,,
Capela et al 2003,Europe,Southern Europe,Portugal,Mugadouro,-6.722,41.328,2003,,,,,,,,
Capela et al 2003,Europe,Southern Europe,Portugal,Orgal,-7.142,41.056,2003,,,,,,,,
Capela et al 2003,Europe,Southern Europe,Portugal,Penamacor,-7.169,40.144,2003,,,,,,,,
Capela et al 2003,Europe,Southern Europe,Portugal,Sao Bras de Alportel,-7.903,37.169,2003,,,,,,,,
Capela et al 2003,Europe,Southern Europe,Portugal,Alcoutin,-7.503,37.456,2003,,,,,,,,
Chaker et al 2005,Africa,Northern Africa,Algeria,Sidi Ameur,3.573,35.428,2000,,,,,,,,
Chaker et al 2005,Africa,Northern Africa,Tunisia,Bekalta,11,35.617,2000,,,,,,,,
Chaker et al 2005,Africa,Northern Africa,Tunisia,Ouardanine,10.677,35.717,2000,,,,,,,,
Chaker et al 2005,Africa,Northern Africa,Tunisia,Mzaougha (Manzil Kamil),10.571,35.542,2000,,,,,,,,
Clastrier and Wirth 1961,Africa,Middle Africa,Democratic Republic of the Congo,Buku N'Situ (M'vouti),12.65,-5.117,1960,,,,,,,,
Clastrier and Wirth 1961,Africa,Middle Africa,Democratic Republic of the Congo,"Gangala na Bodio, Mangava",29.287,3.71,1961,,,,,,,,
Clastrier and Wirth 1961,Africa,Western Africa,Gambia,Manduar (West Kiang District),-16.632,13.245,1961,,,,,,,,
Clastrier and Wirth 1961,Africa,Western Africa,Gambia,Sekuta=Sukuta?,-16.708,13.407,1961,,,,,,,,
Clastrier and Wirth 1961,Africa,Western Africa,Nigeria,Kankiya,7.827,12.543,1961,,,,,,,,
Clastrier and Wirth 1961,Africa,Western Africa,Nigeria,Kaduna,7.433,10.517,1961,,,,,,,,
Cornet 1969,Africa,Western Africa,Burkina Faso,Somousso,-4.033,11.017,1969,,,,,,,,
Cornet 1969,Africa,Western Africa,Senegal,For?t de Bandia,-17.017,14.55,1969,,,,,,,,
Cornet 1969,Africa,Western Africa,Senegal,Saboya,-16.1,13.633,1969,,,,,,,,
Cornet 1969,Africa,Western Africa,Senegal,Sangalkam,-17.233,14.783,1969,,,,,,,,
Cornet 1969,Africa,Western Africa,Senegal,Dioulacolon,-14.867,12.817,1969,,,,,,,,
Cornet 1969,Africa,Western Africa,Senegal,Parc du Niokolo-Koba,-13.3,13.067,1969,,,,,,,,
Cornet 1969,Africa,Western Africa,Senegal,Balingore,-16.35,12.75,1969,,,,,,,,
Dallas et al 2003,Europe,Southern Europe,Portugal,Barca D?Alva,-6.95,41.017,2001,,,,,,,,
Dallas et al 2003,Europe,Southern Europe,Portugal,Alcains,-7.433,39.917,2001,,,,,,,,
Dallas et al 2003,Europe,Southern Europe,Portugal,Castelo de Vide,-7.467,39.433,2001,,,,,,,,
Dallas et al 2003,Asia,Western Asia,Israel,Ma?ale Hahamisha,35.117,31.817,2001,,,,,,,,
Dallas et al 2003,Asia,Western Asia,Israel,Regba,35.1,32.983,2001,,,,,,,,
Dallas et al 2003,Asia,Western Asia,Israel,Merom Golan,35.7,33.167,2001,,,,,,,,
Davies 1978,Africa,Eastern Africa,Kenya,Nairobi,36.967,1.2,1978,,,,,,,,
Davies 1978,Africa,Eastern Africa,Kenya,North-East of Nairobi,36.967,-1.2,1979,,,,,,,,
Davies 1978,Africa,Eastern Africa,Kenya,North-North-West of Nairobi,36.417,-0.567,1979,,,,,,,,
De Meillon 1956,Africa,Southern Africa,Lesotho,"Mamathes, 5 miles ENE Teyateyaneng (Basutoland)",27.74,-29.148,1959,,,,,,,,
De Meillon 1956,Africa,Southern Africa,South Africa,"Lynnwood Manor, 6 miles SE Pretoria (Transvaal)",28.253,-25.757,1959,,,,,,,,
De Meillon 1956,Africa,Southern Africa,South Africa,"Tzitzikama Forest, Stormsrivier (Cape province)",23.878,-33.972,1959,,,,,,,,
De Meillon 1961,Africa,Eastern Africa,Madagascar,"Ivoloina, Tamatave (=Toamasina)",49.231,-17.968,1961,,,,,,,,
Debrah et al 2017,Africa,Western Africa,Ghana,,-0.97,6.97,2014-2015,,,,,,,,
Debrah et al 2017,Africa,Western Africa,Ghana,,-0.88,7.52,2014-2015,,,,,,,,
Debrah et al 2017,Africa,Western Africa,Ghana,,-1.05,7.75,2014-2015,,,,,,,,
Debrah et al 2017,Africa,Western Africa,Ghana,,-0.8,7.71,2014-2015,,,,,,,,
Debrah et al 2017,Africa,Western Africa,Ghana,,-0.59,7.76,2014-2015,,,,,,,,
Debrah et al 2017,Africa,Western Africa,Ghana,,-0.5,7.76,2014-2015,,,,,,,,
Delecolle and De La Rocque 2002,Africa,Northern Africa,Algeria,Willaya de Mostaganem,0.09,35.94,2010,,,,,,,,
Delecolle and De La Rocque 2002,Africa,Northern Africa,Algeria,Willaya de Tlemcen,-1.433,34.798,2010,,,,,,,,
Delecolle and De La Rocque 2002,Africa,Northern Africa,Algeria,Willaya d'El Bayadh,0.56,32.128,2010,,,,,,,,
Diarra et al 2014,Africa,Middle Africa,Chad,,17.33,14.73,2011-2012,,,,,,,,
Diarra et al 2014,Africa,Western Africa,Senegal,,-17.43,14.73,2011-2012,,,,,,,,
Diarra et al 2014,Africa,Western Africa,Senegal,,-16.95,14.79,2011-2012,,,,,,,,
Diarra et al 2014,Africa,Western Africa,Senegal,,-17.04,14.77,2011-2012,,,,,,,,
Dik et al 2006,Asia,Western Asia,Turkey,Nazilli,28.317,37.9,1983,,,,,,,,
Dik et al 2006,Asia,Western Asia,Turkey,Aydin,27.817,37.817,1983,,,,,,,,
Dik et al 2006,Asia,Western Asia,Turkey,Cakmak,29,37.783,1983,,,,,,,,
Dik et al 2006,Asia,Western Asia,Turkey,Salihaga,29.067,37.9,1983,,,,,,,,
Dik et al 2006,Asia,Western Asia,Turkey,Tarsus,34.883,36.917,1993,,,,,,,,
Dik et al 2006,Asia,Western Asia,Turkey,Antalya,30.683,36.9,1993,,,,,,,,
Dik et al 2006,Asia,Western Asia,Turkey,Mezitli,34.617,36.8,1993,,,,,,,,
Dik et al 2006,Asia,Western Asia,Turkey,Adana,35.367,36.967,1993,,,,,,,,
Dik et al 2006,Asia,Western Asia,Turkey,Anamur,32.817,36.067,1993,,,,,,,,
Dik et al 2006,Asia,Western Asia,Turkey,Bornova,27.217,38.45,1996,,,,,,,,
Dik et al 2006,Asia,Western Asia,Turkey,Umurlu,27.95,37.85,1999,,,,,,,,
Dik et al 2006,Asia,Western Asia,Turkey,Iskenderun,36.167,36.567,2003,,,,,,,,
Dyce and Wirth 1983,Asia,Southern Asia,India,Calcutta,88.363,22.573,1983,,,,,,,,
Dyce and Wirth 1983,Asia,Southern Asia,India,Dum Dum,88.42,22.63,1983,,,,,,,,
Dyce and Wirth 1983,Asia,Southern Asia,India,Thakurpukur (near Calcutta),88.313,22.46,1983,,,,,,,,
Fox et al 2016,Europe,Southern Europe,Italy,Villaverde,8.78,39.8,2001-2013,,,,,,,,
Fox et al 2016,Europe,Southern Europe,Italy,Seneghe,8.53,40.05,2001-2013,,,,,,,,
Fox et al 2016,Europe,Southern Europe,Italy,Olmedo,8.37,40.63,2001-2013,,,,,,,,
Fox et al 2016,Europe,Southern Europe,Italy,Sassari-1,8.2,40.75,2001-2013,,,,,,,,
Fox et al 2016,Europe,Southern Europe,Italy,Arzachena,9.38,41.15,2001-2013,,,,,,,,
Fox et al 2016,Europe,Southern Europe,Italy,Lanusei,9.55,39.87,2001-2013,,,,,,,,
Fox et al 2016,Europe,Southern Europe,Italy,S. Antioco,8.42,38.98,2001-2013,,,,,,,,
Gerry et al 2009,Europe,Southern Europe,Spain,Caldes de Mallavella,2.85,41.844,2009,,,,,,,,
Ghonaim et al 2001,Africa,Northern Africa,Egypt,Ismailia,32.267,30.59,1943,,,,,,,,
Ghonaim et al 2001,Africa,Northern Africa,Egypt,"Giza, Bulaq el Dakrur",31.208,30.077,1961,,,,,,,,
Ghonaim et al 2001,Africa,Northern Africa,Egypt,Suez,32.525,29.983,1991,,,,,,,,
Glick 1990,Africa,Eastern Africa,Ethiopia,Gambela (Illubabor Province),34.588,8.245,1990,,,,,,,,
Glick 1990,Africa,Eastern Africa,Kenya,"Karen, Nairobi Province, Nairobi, Rees Barn, Mbagathi River",36.685,-1.322,1990,,,,,,,,
Glick 1990,Africa,Eastern Africa,Zimbabwe,Salisbury (Harare),31.053,-17.83,1990,,,,,,,,
Glick 1990,Africa,Eastern Africa,Zimbabwe,Kariba,28.852,-16.522,1990,,,,,,,,
Glick 1990,Africa,Middle Africa,Chad,region Boumkabio Moyen Chari,18.428,9.063,1990,,,,,,,,
Glick 1990,Africa,Northern Africa,Egypt,region Beheira Governorate (Al Buhayrah),30.343,30,1990,,,,,,,,
Glick 1990,Africa,Western Africa,Gambia,Keneba (West Kiang District),-16.01,13.332,1990,,,,,,,,
Glick 1990,Africa,Western Africa,Ghana,Accra (Gold Coast),-0.197,5.555,1990,,,,,,,,
Glick 1990,Asia,Western Asia,Israel,Neve Yaar,35.179,32.706,1990,,,,,,,,
Goffredo et al 2015,Africa,Southern Africa,Namibia,,19.35,-21.72,2011,,,,,,,,
Goffredo et al 2015,Africa,Southern Africa,Namibia,,18.19,-22.06,2011,,,,,,,,
Goffredo et al 2015,Africa,Southern Africa,Namibia,,17.13,-22.58,2011,,,,,,,,
Goffredo et al 2015,Africa,Southern Africa,Namibia,,15.92,-21.47,2011,,,,,,,,
Goffredo et al 2015,Africa,Southern Africa,Namibia,,15.84,-21.94,2011,,,,,,,,
Goldarazena et al 2008,Europe,Southern Europe,Spain,Oiantzabal,-1.848,43.278,2008,,,,,,,,
Gordon et al 2015,Africa,Eastern Africa,Zimbabwe,,31.04,-17.92,1998-2003,,,,,,,,
Gordon et al 2015,Africa,Eastern Africa,Zimbabwe,,30.49,-17.5,1998-2003,,,,,,,,
Gordon et al 2015,Africa,Eastern Africa,Zimbabwe,,29.58,-16.11,1998-2003,,,,,,,,
Gordon et al 2015,Africa,Northern Africa,Sudan,,25.62,19.99,1998-2003,,,,,,,,
Gordon et al 2015,Africa,Northern Africa,Sudan,,32.9,18.3,1998-2003,,,,,,,,
Gordon et al 2015,Africa,Northern Africa,Sudan,,32.62,20.27,1998-2003,,,,,,,,
Gordon et al 2015,Africa,Northern Africa,Sudan,,30,19,1998-2003,,,,,,,,
Gordon et al 2015,Africa,Northern Africa,Sudan,,28.76,20.17,1998-2003,,,,,,,,
Hammami et al 2008,Africa,Northern Africa,Tunisia,Sidi Thabet,10.037,36.913,2008,,,,,,,,
Hammami et al 2008,Africa,Northern Africa,Tunisia,Belvedere,10.172,36.822,2008,,,,,,,,
Hammami et al 2008,Africa,Northern Africa,Tunisia,Sousse,10.35,35.902,2008,,,,,,,,
Harrup et al 2016,Asia,Southern Asia,India,,80.11,14.56,,,,,,,,,
Herniman et al 1983,Africa,Western Africa,Nigeria,Vom,8.733,9.667,1983,,,,,,,,
Hilali et al 2003,Asia,Western Asia,Saudi Arabia,"Al-Kharj, midlands, oasis",47.317,24.133,1993,,,,,,,,
Hilali et al 2003,Asia,Western Asia,Saudi Arabia,"Abha, highlands, Asseer region, south western",42.5,18.25,1993,,,,,,,,
Itoua and Cornet 1986,Africa,Middle Africa,Republic of Congo,"Dimonika, Mayombe",12.433,-4.233,1986,,,,,,,,
Jacquet et al 2015,Africa,Eastern Africa,Ethiopia,,40.7,8.8,2004,,,,,,,,
Jacquet et al 2015,Africa,Eastern Africa,Kenya,,37.1,0.1,2013,,,,,,,,
Jacquet et al 2015,Africa,Eastern Africa,Madagascar,,47.4,-18,2012,,,,,,,,
Jacquet et al 2015,Africa,Eastern Africa,Mauritius,,57.5,-20.2,2007,,,,,,,,
Jacquet et al 2015,Africa,Eastern Africa,Mozambique,,32.5,-25.9,2013,,,,,,,,
Jacquet et al 2015,Africa,Eastern Africa,Zimbabwe,,31.6,-21.9,2013,,,,,,,,
Jacquet et al 2015,Africa,Middle Africa,Cameroon,,13.5,9.3,2009,,,,,,,,
Jacquet et al 2015,Africa,Northern Africa,Algeria,,8.5,36.8,2003,,,,,,,,
Jacquet et al 2015,Africa,Northern Africa,Morocco,,-6.4,34.4,2004,,,,,,,,
Jacquet et al 2015,Africa,Northern Africa,Tunisia,,10,36,2013,,,,,,,,
Jacquet et al 2015,Africa,Southern Africa,South Africa,,25.5,-33.9,2013,,,,,,,,
Jacquet et al 2015,Africa,Western Africa,Burkina Faso,,-4.3,11.2,2004,,,,,,,,
Jacquet et al 2015,Africa,Western Africa,Mali,,-6.6,11,2010,,,,,,,,
Jacquet et al 2015,Africa,Western Africa,Niger,,3.4,11.9,2009,,,,,,,,
Jacquet et al 2015,Africa,Western Africa,Senegal,,-12.2,12.6,2012,,,,,,,,
Jacquet et al 2016,Europe,Western Europe,France,,1.72,42.78,2008-2012,,,,,,,,
Jacquet et al 2016,Europe,Western Europe,France,,1.31,43.03,2008-2012,,,,,,,,
Jacquet et al 2016,Europe,Western Europe,France,,3.02,42.76,2008-2012,,,,,,,,
Jacquet et al 2016,Europe,Western Europe,France,St Jean Pla de Corts,6.4,43.2,2008-2012,,,,,,,,
Jacquet et al 2016,Europe,Western Europe,France,,6.64,43.49,2008-2012,,,,,,,,
Jacquet et al 2016,Europe,Western Europe,France,,9.43,42.85,2008-2012,,,,,,,,
Jacquet et al 2016,Europe,Western Europe,France,,9.09,41.5,2008-2012,,,,,,,,
Jacquet et al 2016,Europe,Western Europe,France,,3.03,42.57,2008-2013,,,,,,,,
Jacquet et al 2016,Europe,Western Europe,France,,3.06,42.53,2008-2014,,,,,,,,
Jacquet et al 2016,Europe,Western Europe,France,,2.76,42.53,2008-2015,,,,,,,,
Jacquet et al 2016,Europe,Western Europe,France,,2.69,42.51,2008-2016,,,,,,,,
Jacquet et al 2016,Europe,Western Europe,France,,3,42.51,2008-2017,,,,,,,,
Jacquet et al 2016,Europe,Western Europe,France,,2.93,42.51,2008-2020,,,,,,,,
Jacquet et al 2016,Europe,Western Europe,France,,2.87,42.48,2008-2023,,,,,,,,
Jacquet et al 2016,Europe,Western Europe,France,,2.75,42.47,2008-2024,,,,,,,,
Jacquet et al 2016,Europe,Western Europe,France,,3.12,42.47,2008-2025,,,,,,,,
Jacquet et al 2016,Europe,Western Europe,France,,2.81,42.44,2008-2029,,,,,,,,
Jacquet et al 2016 ,Europe,Southern Europe,Italy,San Giovann Suergiu,8.52,39.13,2012,,,,,,,,
Jacquet et al 2016 ,Europe,Western Europe,France,San Giuliano,9.54,42.29,2001-2012,,,,,,,,
Jacquet et al 2016 ,Europe,Western Europe,France,Moltifao,9.12,42.47,2001-2012,,,,,,,,
Jacquet et al 2016 ,Europe,Western Europe,France,Calvi,8.76,42.54,2001-2012,,,,,,,,
Jacquet et al 2016 ,Europe,Western Europe,France,Porto-Vecchio,9.25,41.59,2001-2012,,,,,,,,
Jacquet et al 2016 ,Europe,Western Europe,France,Bastelicaccia,8.82,41.94,2001-2012,,,,,,,,
Jacquet et al 2016 ,Europe,Western Europe,France,Roquebrune-sur-Argens,6.68,43.4,2006-2012,,,,,,,,
Khamala 1971,Africa,Eastern Africa,Kenya,Kiambu,36.83,-1.175,1971,,,,,,,,
Khamala 1971,Africa,Eastern Africa,Kenya,Nairobi,36.817,-1.283,1971,,,,,,,,
Khamala 1971,Africa,Eastern Africa,Kenya,Kaimosi,34.845,0.125,1971,,,,,,,,
Khamala 1971,Africa,Eastern Africa,Kenya,Naivasha,36.438,-0.71,1971,,,,,,,,
Khamala 1971,Africa,Eastern Africa,Kenya,Nakuru,36.067,0.283,1971,,,,,,,,
Khamala 1971,Africa,Eastern Africa,Tanzania,Muheza,38.792,-5.177,1971,,,,,,,,
Khamala 1971,Africa,Eastern Africa,Tanzania,Amani,38.633,-5.1,1971,,,,,,,,
Khamala 1971,Africa,Eastern Africa,Tanzania,Namanga,36.783,-2.55,1971,,,,,,,,
Khamala 1971,Africa,Eastern Africa,Uganda,Zika forest (Mpanga),32.083,0.25,1971,,,,,,,,
Khamala 1971,Africa,Eastern Africa,Uganda,Entebbe,32.465,0.053,1971,,,,,,,,
Kitaoka et al 1984,Africa,Western Africa,Nigeria,Ife,4.558,7.475,1984,,,,,,,,
Kremer 1972,Africa,Middle Africa,Angola,"Cubal, Marco de Canavezes, Barrage de la Companhia de Acucar de Angola",14.248,-13.038,1972,,,,,,,,
Kremer 1972,Africa,Middle Africa,Angola,Dundo,20.817,-7.367,1972,,,,,,,,
Labuschagne et al 2007,Africa,Southern Africa,South Africa,"Pretoria, National Zoological Gardens",28.183,-25.75,2007,,,,,,,,
Liebenberg et al 2016,Africa,Southern Africa,Namibia,,17.59,-22.45,2013-2014,,,,,,,,
Liebenberg et al 2016,Africa,Southern Africa,Namibia,,16.92,-21.98,2013-2014,,,,,,,,
Liebenberg et al 2016,Africa,Southern Africa,Namibia,,16.25,-26.66,2013-2014,,,,,,,,
Magliano et al 2018,Europe,Southern Europe,Italy,,10.06,44.06,2010-2013,,,,,,,,
Martinez-DE LA Puent et al 2017,Europe,Southern Europe,Spain,Coin,-4.75,36.66,2011/2012,,,,,,,,
Martinez-DE LA Puent et al 2017,Europe,Southern Europe,Spain,Almonte,-6.46,37.14,2011/2012,,,,,,,,
Martinez-DE LA Puent et al 2017,Europe,Southern Europe,Spain,Tarifa,-5.63,36.08,2011/2012,,,,,,,,
Martinez-DE LA Puent et al 2017,Europe,Southern Europe,Spain,Lora del Rio,-5.51,37.67,2011/2012,,,,,,,,
Martinez-DE LA Puent et al 2017,Europe,Southern Europe,Spain,Castilblanco de los Arroyos,-6.01,37.74,2011/2012,,,,,,,,
Martinez-DE LA Puent et al 2017,Europe,Southern Europe,Spain,Orgiva,-3.47,36.9,2011/2012,,,,,,,,
Martinez-DE LA Puent et al 2017,Europe,Southern Europe,Spain,Ca?ete de las Torres,-4.33,37.87,2011/2012,,,,,,,,
Mayo et al 2016,Africa,Southern Africa,South Africa,,31.35,-24.71,2013,,,,,,,,
Mayo et al 2016,Africa,Southern Africa,South Africa,,17.15,-29.75,2009-2010,,,,,,,,
Meiswinkel 1989,Africa,Eastern Africa,Malawi,"Kawalazi estate +/- 30 km east of Mzuzu, northern Malawi",34.023,-11.465,1989,,,,,,,,
Meiswinkel 1989,Africa,Southern Africa,Namibia,"farm Bergvlug +/- 30 km east of Windhoek, central Namibia",17.082,-22.558,1989,,,,,,,,
Meiswinkel 1989,Africa,Southern Africa,South Africa,"Honeydew, northern Johannesburg, Transvaal",27.927,-26.08,1989,,,,,,,,
Meiswinkel 1989,Africa,Southern Africa,South Africa,"Mfomoti, False bay park, Northern Natal",32.358,-28.022,1989,,,,,,,,
Meiswinkel 1989,Africa,Southern Africa,South Africa,Ndumu Game Reserve Northern Natal,32.277,-26.888,1989,,,,,,,,
Meiswinkel 1989,Africa,Southern Africa,South Africa,"Verlorenvlei near Redelinghuys, Western Cape",18.642,-33.975,1989,,,,,,,,
Meiswinkel 1989,Africa,Southern Africa,South Africa,"Augrabies National Park, northern cape",20.188,-28.472,1989,,,,,,,,
Meiswinkel 1989,Africa,Southern Africa,South Africa,"farm Veekos, near Upington, northern Cape",21.243,-28.458,1989,,,,,,,,
Meiswinkel 1989,Africa,Southern Africa,South Africa,Manxeba Pan near Pafuri,31.31,-22.448,1989,,,,,,,,
Meiswinkel 1989,Africa,Southern Africa,South Africa,Ngome Tea estaten Northern Natal,30.217,-22.983,1989,,,,,,,,
Meiswinkel 1989,Africa,Southern Africa,South Africa,"Makonde, Vendaland, northern Transvaal",30.555,-22.807,1989,,,,,,,,
Meiswinkel 1989,Africa,Southern Africa,South Africa,"Bergpan salt works, north eastern Transvaal",29.332,-22.97,1989,,,,,,,,
Meiswinkel 1989,Africa,Southern Africa,South Africa,Tshalungwa springs north of Punda Maria,31.01,-22.692,1989,,,,,,,,
Meiswinkel 1989,Africa,Southern Africa,South Africa,Shingwidzi,31.052,-23.107,1989,,,,,,,,
Meiswinkel 1989,Africa,Southern Africa,South Africa,"Tshipese mineral baths, northern Transvaal",30.145,-22.6,1989,,,,,,,,
Meiswinkel 1989,Africa,Southern Africa,South Africa,"Mooketsi, northern Transvaal",30.092,-23.592,1989,,,,,,,,
Meiswinkel 1989,Africa,Southern Africa,South Africa,Eiland mineral baths (Hans Merensky Wilderness) North eastern Transvaal,30.672,-23.696,1989,,,,,,,,
Meiswinkel 1989,Africa,Southern Africa,South Africa,"farm Jaffray, 15km east of Tzaneen",30.167,-23.833,1989,,,,,,,,
Meiswinkel 1989,Africa,Southern Africa,South Africa,"farm Apel, Sekhukhuneland, central Transvaal",30.313,-24.35,1989,,,,,,,,
Meiswinkel 1989,Africa,Southern Africa,South Africa,"farm Krugerspan, Sentrum, north west Transvaal",27.323,-24.26,1989,,,,,,,,
Meiswinkel 1989,Africa,Southern Africa,South Africa,Skukuza buffalo boma,31.6,-24.983,1989,,,,,,,,
Meiswinkel 1989,Africa,Southern Africa,Swaziland,"High Hope riding School, Manzini",31.353,-26.645,1989,,,,,,,,
Meiswinkel 1989,Asia,Western Asia,Iraq,"Baghdad, Iraq",44.392,33.315,1989,,,,,,,,
Meiswinkel 1998,Africa,Southern Africa,South Africa,Cullinan,28.525,-25.675,1998,,,,,,,,
Meiswinkel 1998,Africa,Southern Africa,South Africa,Johannesburg,28.045,-26.202,1998,,,,,,,,
Meiswinkel 1998,Africa,Southern Africa,South Africa,Venterstad,25.795,-30.778,1998,,,,,,,,
Meiswinkel 1998,Africa,Southern Africa,South Africa,Middleburg (Eastern Cape),25.018,-31.507,1998,,,,,,,,
Meiswinkel 1998,Africa,Southern Africa,South Africa,Graaff Reinet,24.54,-32.252,1998,,,,,,,,
Meiswinkel 1998,Africa,Southern Africa,South Africa,Bathurst,26.833,-33.483,1998,,,,,,,,
Meiswinkel 1998,Africa,Southern Africa,South Africa,Uitenhage,25.393,-33.763,1998,,,,,,,,
Meiswinkel 1998,Africa,Southern Africa,South Africa,Port Elizabeth (Fairview),25.53,-33.965,1998,,,,,,,,
Meiswinkel 1998,Africa,Southern Africa,South Africa,Pietermaritzburg,30.383,-29.617,1998,,,,,,,,
Meiswinkel 1998,Africa,Southern Africa,South Africa,Shongweni,30.72,-29.857,1998,,,,,,,,
Meiswinkel 1998,Africa,Southern Africa,South Africa,Durban (Clairwood),30.985,-29.913,1998,,,,,,,,
Meiswinkel 1998,Africa,Southern Africa,South Africa,Springfontein,25.703,-30.262,1998,,,,,,,,
Meiswinkel 1998,Africa,Southern Africa,South Africa,Colesberg,25.097,-30.718,1998,,,,,,,,
Meiswinkel 1998,Africa,Southern Africa,South Africa,Kruger Park,31.445,-23.822,1998,,,,,,,,
Meiswinkel 1998,Africa,Southern Africa,South Africa,Belfast,31.372,-24.952,1998,,,,,,,,
Meiswinkel 1998,Africa,Southern Africa,South Africa,Sabie,30.787,-25.095,1998,,,,,,,,
Meiswinkel 1998,Africa,Southern Africa,South Africa,Pilgrims Rest,30.755,-24.892,1998,,,,,,,,
Meiswinkel 1998,Africa,Southern Africa,South Africa,White River,31.022,-25.322,1998,,,,,,,,
Meiswinkel 1998,Africa,Southern Africa,South Africa,Nelspruit,30.985,-25.465,1998,,,,,,,,
Meiswinkel 1998,Africa,Southern Africa,South Africa,Middleburg (Mpumalanga),29.46,-25.768,1998,,,,,,,,
Mellor et al 1984,Africa,Northern Africa,Sudan,"Umm Benin, 250 miles south of Khartoum on the Blue Nile",33.95,13.067,1984,,,,,,,,
Mellor et al 1984,Africa,Northern Africa,Sudan,"Shambat, University Farm, Khartoum North",32.53,15.658,1984,,,,,,,,
Meloni et al 2018,Europe,Southern Europe,Italy,Tula municipality,8.98,40.73,2014,,,,,,,,
Miranda et al 2003,Europe,Southern Europe,Spain,Llumena de Sant Francesc d'en Netto,4.183,39.933,2003,,,,,,,,
Miranda et al 2003,Europe,Southern Europe,Spain,"Ses Cases Noves, Minorca",4.083,40.033,2003,,,,,,,,
Miranda et al 2003,Europe,Southern Europe,Spain,"Sa Plana Vella, Mallorca",3.267,39.45,2003,,,,,,,,
Miranda et al 2003,Europe,Southern Europe,Spain,"Ca'n Roig Nou, Mallorca",3.083,39.483,2003,,,,,,,,
Miranda et al 2003,Europe,Southern Europe,Spain,"Ca'n Sepera, Mallorca",2.75,39.583,2003,,,,,,,,
Mohammed and Mellor 1990,Africa,Northern Africa,Sudan,"Nyala, Western Sudan",24.833,12.017,1990,,,,,,,,
Munoz-Munoz et al 2014,Europe,Southern Europe,Spain,Corbera de Llobregat,1.92,41.4,2000-2013,,,,,,,,
Munoz-Munoz et al 2014,Europe,Southern Europe,Spain,Bonastre,1.42,41.22,2000-2013,,,,,,,,
Mushi et al 1998,Africa,Southern Africa,South Africa,"Mogoditshane, Gaborone",24.667,-25.917,1998,,,,,,,,
Musuka et al 2001,Africa,Eastern Africa,Zimbabwe,Gwanda,28.983,-20.817,1998,,,,,,,,
Musuka et al 2001,Africa,Eastern Africa,Zimbabwe,Kwekwe,29.917,-19.133,1998,,,,,,,,
Musuka et al 2001,Africa,Eastern Africa,Zimbabwe,Rusape,32.017,-18.533,1998,,,,,,,,
Musuka et al 2001,Africa,Eastern Africa,Zimbabwe,Chipinge,32.667,-20.233,1998,,,,,,,,
Musuka et al 2001,Africa,Eastern Africa,Zimbabwe,Chinhoyi,30.15,-17.483,1998,,,,,,,,
Musuka et al 2001,Africa,Eastern Africa,Zimbabwe,Rekomitjie,29.4,-16.133,1998,,,,,,,,
Musuka et al 2001,Africa,Eastern Africa,Zimbabwe,Inkomo,30.717,-17.667,1998,,,,,,,,
Navai and Mesghali 1968,Asia,Southern Asia,Iran,"Susangerd, near Iraqian border",48.183,31.56,1968,,,,,,,,
Nevill and Nevill 1995,Africa,Southern Africa,South Africa,Umlalazi Nature Reserve nera Mtunzini,31.783,-28.95,1995,,,,,,,,
Nolan et al 2004,Europe,Southern Europe,Greece,"Dimilia, Rhodes",28.033,36.267,2001,,,,,,,,
Nolan et al 2004,Asia,Western Asia,Israel,Kefar Daniyyel,34.933,31.933,2001,,,,,,,,
Nolan et al 2004,Asia,Western Asia,Israel,Kefar Malal,34.9,32.167,2001,,,,,,,,
Nolan et al 2004,Asia,Western Asia,Israel,Mishmar Hasharon,34.9,32.35,2001,,,,,,,,
Nolan et al 2004,Asia,Western Asia,Israel,Yotvata,35.05,29.883,2001,,,,,,,,
Nolan et al 2004,Asia,Western Asia,Israel,Karmiyya,34.55,31.6,2001,,,,,,,,
Nolan et al 2008,Africa,Northern Africa,Algeria,"Commune El Hrouch, Skikda",6.817,36.633,2008,,,,,,,,
Nolan et al 2008,Africa,Northern Africa,Algeria,"Commune El Azaba, Skikda",7.1,36.733,2008,,,,,,,,
Nolan et al 2008,Africa,Northern Africa,Algeria,"Ferme Experimentale de PBK, Tizi-Ouzou",3.95,36.733,2008,,,,,,,,
Nolan et al 2008,Africa,Northern Africa,Algeria,"Private farm, Tizi-Ouzou",4.3,36.75,2008,,,,,,,,
Nolan et al 2008,Africa,Northern Africa,Algeria,"Lac Tonga, El Tarf",8.533,36.883,2008,,,,,,,,
Nolan et al 2008,Africa,Northern Africa,Algeria,"Commune of Kaous, Jijel",5.783,36.767,2008,,,,,,,,
Nolan et al 2008,Africa,Northern Africa,Algeria,"Commune of Texenna, Jijel",5.783,36.683,2008,,,,,,,,
Nolan et al 2008,Africa,Northern Africa,Morocco,Ben Slimane,-7.117,33.6,2008,,,,,,,,
Nolan et al 2008,Africa,Northern Africa,Morocco,Larache,-5.933,35.217,2008,,,,,,,,
Nolan et al 2008,Africa,Northern Africa,Morocco,Khemisset,-6.517,34.033,2008,,,,,,,,
Nolan et al 2008,Africa,Northern Africa,Morocco,Kenitra,-6.217,34.833,2008,,,,,,,,
Nolan et al 2008,Africa,Northern Africa,Morocco,Beni Mellal,-6.267,32.567,2008,,,,,,,,
Nolan et al 2008,Africa,Northern Africa,Morocco,Tetouan,-5.383,35.433,2008,,,,,,,,
Nolan et al 2008,Africa,Northern Africa,Morocco,Ouarzazate,-6.783,30.967,2008,,,,,,,,
Nolan et al 2008,Africa,Northern Africa,Tunisia,Gafsa,8.65,34.417,1998,,,,,,,,
Nolan et al 2008,Europe,Southern Europe,Greece,"Imeros, Rodopi",25.367,40.95,2008,,,,,,,,
Nolan et al 2008,Europe,Southern Europe,Greece,Aghios Loukas,24.033,38.45,2008,,,,,,,,
Nolan et al 2008,Europe,Southern Europe,Italy,"Campagnano, Rome",12.6,42.2,2008,,,,,,,,
Nolan et al 2008,Europe,Southern Europe,Italy,"Fiumicino, Rome",12.167,41.933,2008,,,,,,,,
Nolan et al 2008,Europe,Southern Europe,Italy,"Fondi, Latina",13.667,41.483,2008,,,,,,,,
Nolan et al 2008,Europe,Southern Europe,Italy,"Cerda, Palermo",13.833,37.917,2008,,,,,,,,
Nolan et al 2008,Europe,Southern Europe,Italy,Elba Island,10.35,42.783,2008,,,,,,,,
Nolan et al 2008,Europe,Southern Europe,Italy,"Magliano, Grosseto",11.217,42.617,2008,,,,,,,,
Nolan et al 2008,Europe,Southern Europe,Italy,Grosseto,11.133,42.75,2008,,,,,,,,
Nolan et al 2008,Europe,Southern Europe,Italy,"Riparbella, Livorno",10.883,43.567,2008,,,,,,,,
Nolan et al 2008,Europe,Southern Europe,Portugal,Viana Alentejo,-7.933,38.367,2008,,,,,,,,
Nolan et al 2008,Europe,Southern Europe,Portugal,Nisa,-7.633,39.533,2008,,,,,,,,
Nolan et al 2008,Europe,Southern Europe,Portugal,Fernao Ferro,-9.117,38.567,2008,,,,,,,,
Nolan et al 2008,Europe,Southern Europe,Portugal,Fundao,-7.467,40.183,2008,,,,,,,,
Nolan et al 2008,Europe,Southern Europe,Portugal,Tomar,-8.083,39.583,2008,,,,,,,,
Nolan et al 2008,Europe,Southern Europe,Spain,"Son Gornes, Menorca",3.983,39.983,2008,,,,,,,,
Nolan et al 2008,Europe,Southern Europe,Spain,"Son Sard, Mallorca",3.383,39.633,2008,,,,,,,,
Nolan et al 2008,Europe,Southern Europe,Spain,Talayuela,-5.317,40,2008,,,,,,,,
Nolan et al 2008,Europe,Southern Europe,Spain,"Ses Veles, Mallorca",3.433,39.667,2008,,,,,,,,
Nolan et al 2008,Europe,Southern Europe,Spain,Navalmoral de la Mata,-5.383,39.583,2008,,,,,,,,
Nolan et al 2008,Asia,Western Asia,Turkey,Torbali,27.35,38.15,2008,,,,,,,,
Nolan et al 2008,Asia,Western Asia,Turkey,Korukoy,27.717,37.233,2008,,,,,,,,
Nolan et al 2008,Asia,Western Asia,Turkey,Camkoy,29.167,36.65,2008,,,,,,,,
Nolan et al 2008,Asia,Western Asia,Turkey,Akcaova,28.283,37.233,2008,,,,,,,,
Nolan et al 2008,Asia,Western Asia,Turkey,Kizilyaka,28.45,37.017,2008,,,,,,,,
Nolan et al 2008,Asia,Western Asia,Turkey,Camlik Koyu,28.283,36.967,2008,,,,,,,,
Nolan et al 2008,Asia,Western Asia,Turkey,Gocek,28.883,36.75,2008,,,,,,,,
Nolan et al 2008,Asia,Western Asia,United Arab Emirates,"Central Veterinary Research Laboratory, Dubai",55.283,25.217,2008,,,,,,,,
Nolan et al 2008,Europe,Western Europe,France,Monaccia d'Aullene,9.017,41.483,1996,,,,,,,,
Nolan et al 2008,Europe,Western Europe,France,Porto-Vecchio,9.267,41.517,2008,,,,,,,,
Onyango et al 2015,Africa,Eastern Africa,Kenya,Marigat,35.99,-0.47,2014,,,,,,,,
Onyango et al 2015,Africa,Eastern Africa,Madagascar,Ambalavao,46.93,-21.83,2014,,,,,,,,
Onyango et al 2015,Europe,Southern Europe,Spain,Mallorca,2.95,39.61,2014,,,,,,,,
Ortega and Holbrook 1994,Europe,Southern Europe,Spain,Bailen,-3.767,38.1,1994,,,,,,,,
Ortega and Holbrook 1994,Europe,Southern Europe,Spain,Carboneras,-3.617,38.217,1994,,,,,,,,
Ortega et al 1997,Europe,Southern Europe,Portugal,Rosal,-7.583,37.967,1997,,,,,,,,
Ortega et al 1997,Europe,Southern Europe,Spain,Alora,-4.75,36.817,1997,,,,,,,,
Ortega et al 1997,Europe,Southern Europe,Spain,Pizarra,-4.667,36.75,1997,,,,,,,,
Ortega et al 1997,Europe,Southern Europe,Spain,Acala,-5.833,37.333,1997,,,,,,,,
Ortega et al 1997,Europe,Southern Europe,Spain,Aracena,-6.55,37.867,1997,,,,,,,,
Ortega et al 1997,Europe,Southern Europe,Spain,Jerez,-6.05,36.717,1997,,,,,,,,
Ortega et al 1997,Europe,Southern Europe,Spain,Utrera,-5.733,37.167,1997,,,,,,,,
Ortega et al 1997,Europe,Southern Europe,Spain,Rincon,-4.25,36.717,1997,,,,,,,,
Ortega et al 1997,Europe,Southern Europe,Spain,Sevilla,-6,37.417,1997,,,,,,,,
Ortega et al 1997,Europe,Southern Europe,Spain,Pozoblanco,-4.8,38.367,1997,,,,,,,,
Ortega et al 1997,Europe,Southern Europe,Spain,Velez,-4.1,36.783,1997,,,,,,,,
Ortega et al 1997,Europe,Southern Europe,Spain,Casabermeja,-4.45,36.883,1997,,,,,,,,
Ortega et al 1997,Europe,Southern Europe,Spain,Ecija,-5.15,37.75,1997,,,,,,,,
Ortega et al 1997,Europe,Southern Europe,Spain,Medina,-5.917,36.45,1997,,,,,,,,
Ortega et al 1997,Europe,Southern Europe,Spain,Sanlucar,-6.283,36.783,1997,,,,,,,,
Ortega et al 1997,Europe,Southern Europe,Spain,Olvera,-5.25,36.917,1997,,,,,,,,
Ortega et al 1997,Europe,Southern Europe,Spain,Gaucin,-5.283,36.55,1997,,,,,,,,
Ortega et al 1997,Europe,Southern Europe,Spain,Constatina,-5.583,37.833,1997,,,,,,,,
Ortega et al 1997,Europe,Southern Europe,Spain,Castilleja,-6.083,37.417,1997,,,,,,,,
Ortega et al 1997,Europe,Southern Europe,Spain,Algodonales,-5.417,36.883,1997,,,,,,,,
Ortega et al 1997,Europe,Southern Europe,Spain,Antequera,-4.567,37.05,1997,,,,,,,,
Ortega et al 1997,Europe,Southern Europe,Spain,Alcolea,-5.65,37.617,1997,,,,,,,,
Ortega et al 1997,Europe,Southern Europe,Spain,Huelva,-6.9,37.333,1997,,,,,,,,
Ortega et al 1997,Europe,Southern Europe,Spain,Lora,-5.55,37.633,1997,,,,,,,,
Ortega et al 1997,Europe,Southern Europe,Spain,Trebujena,-6.183,36.867,1997,,,,,,,,
Ortega et al 1997,Europe,Southern Europe,Spain,Barbate,-5.933,36.2,1997,,,,,,,,
Ortega et al 1997,Europe,Southern Europe,Spain,Posadas,-5.133,37.817,1997,,,,,,,,
Ortega et al 1997,Europe,Southern Europe,Spain,Alhaurin,-4.567,36.667,1997,,,,,,,,
Ortega et al 1997,Europe,Southern Europe,Spain,Lora,-5.617,37.533,1997,,,,,,,,
Ortega et al 1997,Europe,Southern Europe,Spain,Aracena,-6.283,37.85,1997,,,,,,,,
Ortega et al 1997,Europe,Southern Europe,Spain,Ronda,-5.15,36.733,1997,,,,,,,,
Ortega et al 1997,Europe,Southern Europe,Spain,La Campana,-5.4,37.567,1997,,,,,,,,
Ortega et al 1997,Europe,Southern Europe,Spain,Niebla,-6.683,37.383,1997,,,,,,,,
Ortega et al 1997,Europe,Southern Europe,Spain,Huelva,-6.917,37.25,1997,,,,,,,,
Ortega et al 1997,Europe,Southern Europe,Spain,Penarroya,-5.217,38.3,1997,,,,,,,,
Ortega et al 1997,Europe,Southern Europe,Spain,Osuna,-5.083,37.317,1997,,,,,,,,
Ortega et al 1997,Europe,Southern Europe,Spain,Montoro,-4.35,38.017,1997,,,,,,,,
Ortega et al 1997,Europe,Southern Europe,Spain,Ecija,-5.1,37.5,1997,,,,,,,,
Ortega et al 1997,Europe,Southern Europe,Spain,Osuna,-5.167,37.3,1997,,,,,,,,
Ortega et al 1997,Europe,Southern Europe,Spain,Baena,-4.283,37.617,1997,,,,,,,,
Ortega et al 1997,Europe,Southern Europe,Spain,Fuentes,-5.333,37.383,1997,,,,,,,,
Ortega et al 1997,Europe,Southern Europe,Spain,Cardena,-4.283,38.2,1997,,,,,,,,
Ortega et al 1997,Europe,Southern Europe,Spain,Andevalo,-7.167,37.7,1997,,,,,,,,
Ortega et al 1997,Europe,Southern Europe,Spain,Cordoba,-4.8,37.25,1997,,,,,,,,
Ortega et al 1997,Europe,Southern Europe,Spain,Cabeza,-7.133,37.783,1997,,,,,,,,
Ortega et al 1997,Europe,Southern Europe,Spain,Valverde,-6.883,37.567,1997,,,,,,,,
Ortega et al 1997,Europe,Southern Europe,Spain,Aroche,-6.967,37.967,1997,,,,,,,,
Ortega et al 1997,Europe,Southern Europe,Spain,Teba,-4.867,36.95,1997,,,,,,,,
Ortega et al 1997,Europe,Southern Europe,Spain,San Roque,-5.383,36.217,1997,,,,,,,,
Ortega et al 1997,Europe,Southern Europe,Spain,Lucena,-4.383,37.4,1997,,,,,,,,
Ortega et al 1997,Europe,Southern Europe,Spain,Castellar,-5.417,36.283,1997,,,,,,,,
Ortega et al 1997,Europe,Southern Europe,Spain,Penaflor,-5.283,37.667,1997,,,,,,,,
Ortega et al 1998,Europe,Southern Europe,Spain,"Mijas, Malaga province",-4.637,36.596,1998,,,,,,,,
Ortega et al 1998,Europe,Southern Europe,Spain,"Navalmoral de la Mata, Caceres province",-5.54,39.893,1998,,,,,,,,
Ortega et al 1998,Europe,Southern Europe,Spain,"Coria, Caceres province",-6.533,39.983,1998,,,,,,,,
Ortega et al 1998,Europe,Southern Europe,Spain,"Badajoz, Badajoz province",-6.967,38.883,1998,,,,,,,,
Ortega et al 1998,Europe,Southern Europe,Spain,"Nambroca, Toledo province",-3.943,39.794,1998,,,,,,,,
Ortega et al 1998,Europe,Southern Europe,Spain,"Calzada de Calatrava, Ciudad Real province",-3.776,38.704,1998,,,,,,,,
Ortega et al 1998,Europe,Southern Europe,Spain,"Azuaga, Badajoz province",-5.678,38.259,1998,,,,,,,,
Pages et al 2017,Europe,Southern Europe,Spain,Sant Iscle de Vallalta,2.55,41.64,2009-2012,,,,,,,,
Pages et al 2017,Europe,Southern Europe,Spain,Aramunt,0.99,42.21,2009-2012,,,,,,,,
Pages et al 2017,Europe,Southern Europe,Spain,Amposta,0.56,40.73,2009-2012,,,,,,,,
Pages et al 2017,Europe,Southern Europe,Spain,Santa Clara,-5.45,36.32,2009-2012,,,,,,,,
Pages et al 2017,Europe,Southern Europe,Spain,Terrades,2.8,42.31,2009-2012,,,,,,,,
Pages et al 2017,Europe,Southern Europe,Spain,Juanar,-4.89,36.57,2009-2012,,,,,,,,
Pages et al 2017,Europe,Southern Europe,Spain,Quintos de Mora,-4.12,39.39,2009-2012,,,,,,,,
Pages et al 2017,Europe,Southern Europe,Spain,Piera,1.76,41.5,2009-2012,,,,,,,,
Pages et al 2017,Europe,Southern Europe,Spain,La Galera,0.47,40.68,2009-2012,,,,,,,,
Pages et al 2017,Europe,Southern Europe,Spain,Garcia,0.65,41.14,2009-2012,,,,,,,,
Pages et al 2017,Europe,Southern Europe,Spain,Massanas,2.64,41.77,2009-2012,,,,,,,,
Pages et al 2017,Europe,Southern Europe,Spain,La Morera,-4.27,38.91,2009-2012,,,,,,,,
Pages et al 2017,Europe,Southern Europe,Spain,Brunyola,2.69,41.9,2009-2012,,,,,,,,
Patakakis et al 2009,Europe,Southern Europe,Greece,Lesbos Island,26.333,39.167,1999,,,,,,,,
Patakakis et al 2009,Europe,Southern Europe,Greece,Omolio,22.643,39.894,1999,,,,,,,,
Patakakis et al 2009,Europe,Southern Europe,Greece,Halkidiki,23.499,40.338,1999,,,,,,,,
Patakakis et al 2009,Europe,Southern Europe,Greece,Samos Island,26.833,37.75,1999,,,,,,,,
Patakakis et al 2009,Europe,Southern Europe,Greece,Kos Island,27.233,36.85,1999,,,,,,,,
Ramilo et al 2017,Europe,Southern Europe,Portugal,,-8.57,41.92,2005-2013,,,,,,,,
Ramilo et al 2017,Europe,Southern Europe,Portugal,,-8.94,38.58,2005-2013,,,,,,,,
Ramilo et al 2017,Europe,Southern Europe,Portugal,,-8.92,39.41,2005-2013,,,,,,,,
Ramilo et al 2017,Europe,Southern Europe,Portugal,,-8.42,39.57,2005-2013,,,,,,,,
Ramilo et al 2017,Europe,Southern Europe,Portugal,,-8.43,40.21,2005-2013,,,,,,,,
Ramilo et al 2017,Europe,Southern Europe,Portugal,,-8.23,38.63,2005-2013,,,,,,,,
Ramilo et al 2017,Europe,Southern Europe,Portugal,,-8.34,37.75,2005-2013,,,,,,,,
Ramilo et al 2017,Europe,Southern Europe,Portugal,,-7.22,38.08,2005-2013,,,,,,,,
Ramilo et al 2017,Europe,Southern Europe,Portugal,,-8,41.27,2005-2013,,,,,,,,
Ramilo et al 2017,Europe,Southern Europe,Portugal,,-7.81,38.02,2005-2013,,,,,,,,
Ramilo et al 2017,Europe,Southern Europe,Portugal,,-8.28,39.48,2005-2013,,,,,,,,
Ramilo et al 2017,Europe,Southern Europe,Portugal,,-7.25,40.39,2005-2013,,,,,,,,
Ramilo et al 2017,Europe,Southern Europe,Portugal,,-7.98,38.65,2005-2013,,,,,,,,
Ramilo et al 2017,Europe,Southern Europe,Portugal,,-7.48,37.23,2005-2013,,,,,,,,
Ramilo et al 2017,Europe,Southern Europe,Portugal,,-7.21,39.91,2005-2013,,,,,,,,
Ramilo et al 2017,Europe,Southern Europe,Portugal,,-7.3,39.92,2005-2013,,,,,,,,
Ramilo et al 2017,Europe,Southern Europe,Portugal,,-7.17,41.51,2005-2013,,,,,,,,
Ramilo et al 2017,Europe,Southern Europe,Portugal,,-8.33,41.02,2005-2013,,,,,,,,
Ramilo et al 2017,Europe,Southern Europe,Portugal,,-7.97,39.28,2005-2013,,,,,,,,
Ramilo et al 2017,Europe,Southern Europe,Portugal,,-7.22,40.08,2005-2013,,,,,,,,
Ramilo et al 2017,Europe,Southern Europe,Portugal,,-8.72,37.51,2005-2013,,,,,,,,
Ramilo et al 2017,Europe,Southern Europe,Portugal,,-8.63,37.63,2005-2013,,,,,,,,
Ramilo et al 2017,Europe,Southern Europe,Portugal,,-8.09,39.51,2005-2013,,,,,,,,
Ramilo et al 2017,Europe,Southern Europe,Portugal,,-7.43,39.3,2005-2013,,,,,,,,
Ramilo et al 2017,Europe,Southern Europe,Portugal,,-7.64,40.19,2005-2013,,,,,,,,
Ramilo et al 2017,Europe,Southern Europe,Portugal,,-8.44,40.46,2005-2013,,,,,,,,
Ramilo et al 2017,Europe,Southern Europe,Portugal,,-7.48,40.25,2005-2013,,,,,,,,
Ramilo et al 2017,Europe,Southern Europe,Portugal,,-7.51,40.15,2005-2013,,,,,,,,
Ramilo et al 2017,Europe,Southern Europe,Portugal,,-7.71,39.65,2005-2013,,,,,,,,
Ramilo et al 2017,Europe,Southern Europe,Portugal,,-7.58,39.27,2005-2013,,,,,,,,
Ramilo et al 2017,Europe,Southern Europe,Portugal,,-7.26,40.17,2005-2013,,,,,,,,
Ramilo et al 2017,Europe,Southern Europe,Portugal,,-7.34,39.83,2005-2013,,,,,,,,
Ramilo et al 2017,Europe,Southern Europe,Portugal,,-8.5,38.14,2005-2013,,,,,,,,
Ramilo et al 2017,Europe,Southern Europe,Portugal,,-6.43,41.38,2005-2013,,,,,,,,
Ramilo et al 2017,Europe,Southern Europe,Portugal,,-8.76,39.78,2005-2013,,,,,,,,
Ramilo et al 2017,Europe,Southern Europe,Portugal,,-8.91,39.84,2005-2013,,,,,,,,
Ramilo et al 2017,Europe,Southern Europe,Portugal,,-8.81,39.73,2005-2013,,,,,,,,
Ramilo et al 2017,Europe,Southern Europe,Portugal,,-8.02,40.52,2005-2013,,,,,,,,
Ramilo et al 2017,Europe,Southern Europe,Portugal,,-7.55,37.75,2005-2013,,,,,,,,
Ramilo et al 2017,Europe,Southern Europe,Portugal,,-7.53,37.62,2005-2013,,,,,,,,
Ramilo et al 2017,Europe,Southern Europe,Portugal,,-8.01,40.46,2005-2013,,,,,,,,
Ramilo et al 2017,Europe,Southern Europe,Portugal,,-8.06,39.72,2005-2013,,,,,,,,
Ramilo et al 2017,Europe,Southern Europe,Portugal,,-7.59,39.7,2005-2013,,,,,,,,
Ramilo et al 2017,Europe,Southern Europe,Portugal,,-8.13,39.83,2005-2013,,,,,,,,
Rawlings et al 1998,Europe,Southern Europe,Portugal,Muge,-8.683,39.083,1998,,,,,,,,
Rawlings et al 1998,Europe,Southern Europe,Portugal,Barrancos,-7.017,38.117,1998,,,,,,,,
Rawlings et al 1998,Europe,Southern Europe,Portugal,Evora,-8.033,38.5,1998,,,,,,,,
Rawlings et al 1998,Europe,Southern Europe,Portugal,Freixo de Espada a Cinta,-6.9,41.083,1998,,,,,,,,
Rawlings et al 1998,Europe,Southern Europe,Spain,Mijas,-4.633,36.55,1998,,,,,,,,
Rawlings et al 1998,Europe,Southern Europe,Spain,Constantina,-5.633,37.883,1998,,,,,,,,
Rawlings et al 1998,Europe,Southern Europe,Spain,Talavera,-4.85,39.967,1998,,,,,,,,
Rawlings et al 1998,Europe,Southern Europe,Spain,Coria,-6.817,39.85,1998,,,,,,,,
Rawlings et al 1998,Europe,Southern Europe,Spain,Velez Malaga,-3.717,36.867,1998,,,,,,,,
Rawlings et al 1998,Europe,Southern Europe,Spain,Sagrajas (13km from Badajoz),-6.85,38.933,1998,,,,,,,,
Rawlings et al 1998,Europe,Southern Europe,Spain,Azuaga,-5.567,38.433,1998,,,,,,,,
Rawlings et al 1998,Europe,Southern Europe,Spain,Calatrava,-3.883,38.6,1998,,,,,,,,
Ribeiro et al 2015,Europe,Southern Europe,Portugal,Benavente,-8.84,38.98,2005,,,,,,,,
Ribeiro et al 2015,Europe,Southern Europe,Portugal,Alcochete,-8.92,38.71,2005,,,,,,,,
Ribeiro et al 2015,Europe,Southern Europe,Portugal,Palmela,-8.64,38.65,2005,,,,,,,,
Ribeiro et al 2015,Europe,Southern Europe,Portugal,Coruche,-8.4,39.11,2005,,,,,,,,
Ribeiro et al 2015,Europe,Southern Europe,Portugal,Idanha-A-Nova,-7.5,39.84,2005,,,,,,,,
Ribeiro et al 2015,Europe,Southern Europe,Portugal,Loule,-8.12,37.26,2005,,,,,,,,
Ribeiro et al 2015,Europe,Southern Europe,Portugal,Sert?,-8.22,39.83,2005,,,,,,,,
Ribeiro et al 2015,Europe,Southern Europe,Portugal,Alenquer,-9,39.08,2006,,,,,,,,
Ribeiro et al 2015,Europe,Southern Europe,Portugal,Coruche,-8.7,38.97,2006,,,,,,,,
Ribeiro et al 2015,Europe,Southern Europe,Portugal,Beja,-7.9,38.03,2006,,,,,,,,
Ribeiro et al 2015,Europe,Southern Europe,Portugal,Chamusca,-8.4,39.45,2006,,,,,,,,
Ribeiro et al 2015,Europe,Southern Europe,Portugal,Beja,-8.09,37.85,2006,,,,,,,,
Ribeiro et al 2015,Europe,Southern Europe,Portugal,Reguengos De Monsaraz,-7.55,38.4,2006,,,,,,,,
Ribeiro et al 2015,Europe,Southern Europe,Portugal,Portalegre,-7.65,39.4,2006,,,,,,,,
Ribeiro et al 2015,Europe,Southern Europe,Portugal,Fundao,-7.46,40.01,2006,,,,,,,,
Ribeiro et al 2015,Europe,Southern Europe,Portugal,Arraiolos,-8.05,38.79,2006,,,,,,,,
Ribeiro et al 2015,Europe,Southern Europe,Portugal,Penamacor,-7.15,40.23,2006,,,,,,,,
Ribeiro et al 2015,Europe,Southern Europe,Portugal,Alcoutim,-7.52,37.5,2006,,,,,,,,
Ribeiro et al 2015,Europe,Southern Europe,Portugal,Alcacer Do Sal,-8.51,38.37,2007,,,,,,,,
Ribeiro et al 2015,Europe,Southern Europe,Portugal,Sardoal,-8.15,39.55,2007,,,,,,,,
Ribeiro et al 2015,Europe,Southern Europe,Portugal,Idanha-A-Nova,-7.26,39.78,2007,,,,,,,,
Ribeiro et al 2015,Europe,Southern Europe,Portugal,Palmela,-8.78,38.73,2008,,,,,,,,
Ribeiro et al 2015,Europe,Southern Europe,Portugal,Coruche,-8.59,38.83,2008,,,,,,,,
Ribeiro et al 2015,Europe,Southern Europe,Portugal,Odemira,-8.61,37.71,2008,,,,,,,,
Ribeiro et al 2015,Europe,Southern Europe,Portugal,Portalegre,-7.49,39.29,2008,,,,,,,,
Ribeiro et al 2015,Europe,Southern Europe,Portugal,Avis,-7.89,39.04,2008,,,,,,,,
Ribeiro et al 2015,Europe,Southern Europe,Portugal,Rio Maior,-8.89,39.26,2009,,,,,,,,
Ribeiro et al 2015,Europe,Southern Europe,Portugal,Beja,-7.93,37.99,2009,,,,,,,,
Ribeiro et al 2015,Europe,Southern Europe,Portugal,Chamusca,-8.32,39.26,2009,,,,,,,,
Ribeiro et al 2015,Europe,Southern Europe,Portugal,Idanha-A-Nova,-6.97,39.89,2009,,,,,,,,
Ribeiro et al 2015,Europe,Southern Europe,Portugal,Idanha-A-Nova,-7.3,39.87,2009,,,,,,,,
Ribeiro et al 2015,Europe,Southern Europe,Portugal,Arraiolos,-8.08,38.74,2009,,,,,,,,
Ribeiro et al 2015,Europe,Southern Europe,Portugal,Fundao,-7.42,40.1,2009,,,,,,,,
Ribeiro et al 2015,Europe,Southern Europe,Portugal,Elvas,-7.19,38.78,2010,,,,,,,,
Ribeiro et al 2015,Europe,Southern Europe,Portugal,Moura,-7.41,38.1,2010,,,,,,,,
Ribeiro et al 2015,Europe,Southern Europe,Portugal,Coruche,-8.46,38.99,2010,,,,,,,,
Ribeiro et al 2015,Europe,Southern Europe,Portugal,Evora,-7.85,38.5,2010,,,,,,,,
Sambou et al 2015,Africa,Western Africa,Guinea,,-13.57,12.55,2014,,,,,,,,
Sambou et al 2015,Africa,Western Africa,Senegal,,-16.38,13.68,2014,,,,,,,,
Sambou et al 2015,Africa,Western Africa,Senegal,,-16.47,13.73,2014,,,,,,,,
Sambou et al 2015,Africa,Western Africa,Senegal,,-16.47,13.78,2014,,,,,,,,
Sambou et al 2015,Africa,Western Africa,Senegal,,-16.65,12.5,2014,,,,,,,,
Sambou et al 2015,Africa,Western Africa,Senegal,,-16.57,12.53,2014,,,,,,,,
Sambou et al 2015,Africa,Western Africa,Senegal,,-12.3,12.53,2014,,,,,,,,
Sambou et al 2015,Africa,Western Africa,Senegal,,-12.37,12.5,2014,,,,,,,,
Sambou et al 2015,Africa,Western Africa,Senegal,,-12.45,12.52,2014,,,,,,,,
Sambou et al 2015,Africa,Western Africa,Senegal,,-12.45,12.63,2014,,,,,,,,
SartoIMonteys et al 2005,Europe,Southern Europe,Spain,Bellaterra (Province of Barcelona),2.1,41.517,1990,,,,,,,,
SartoIMonteys et al 2005,Europe,Southern Europe,Spain,Vilanova de la Muga (Province of Girona),3.033,42.267,1990,,,,,,,,
SartoIMonteys et al 2005,Europe,Southern Europe,Spain,Sant Just Desvern (Province of Barcelona),2.067,41.367,2005,,,,,,,,
SartoIMonteys et al 2005,Europe,Southern Europe,Spain,Dosrius (Province of Barcelona),2.417,41.583,2005,,,,,,,,
Sebastiani et al 2001,Africa,Southern Africa,South Africa,Phalaborwa,31.117,-23.933,1998,,,,,,,,
Sghaier et al 2017,Africa,Northern Africa,Tunisia,Takelsa,10.74,36.87,2006-2008,,,,,,,,
Sghaier et al 2017,Africa,Northern Africa,Tunisia,Borj Amri,9.88,36.69,2006-2008,,,,,,,,
Sghaier et al 2017,Africa,Northern Africa,Tunisia,Thibar,9.1,36.53,2006-2008,,,,,,,,
Sghaier et al 2017,Africa,Northern Africa,Tunisia,Mateur,9.61,37.06,2006-2008,,,,,,,,
Sghaier et al 2017,Africa,Northern Africa,Tunisia,Enfidha,10.38,36.12,2006-2008,,,,,,,,
Sghaier et al 2017,Africa,Northern Africa,Tunisia,Touila/Sidi bouzid ouest,9.45,35.03,2006-2008,,,,,,,,
Sghaier et al 2017,Africa,Northern Africa,Tunisia,Chaal/Thina,10.64,34.68,2006-2008,,,,,,,,
Sghaier et al 2017,Africa,Northern Africa,Tunisia,Alem/Sebikha,10.05,35.9,2006-2008,,,,,,,,
Sghaier et al 2017,Africa,Northern Africa,Tunisia,Sened,9.2,34.55,2006-2008,,,,,,,,
Sghaier et al 2017,Africa,Northern Africa,Tunisia,Kettana/Mareth,10.24,33.73,2006-2008,,,,,,,,
Sghaier et al 2017,Africa,Northern Africa,Tunisia,Oued darb/ Kasserine Sud,8.84,35.18,2006-2008,,,,,,,,
Sghaier et al 2017,Africa,Northern Africa,Tunisia,Rmila/Siliana Sud,9.4,36.02,2006-2008,,,,,,,,
Sghaier et al 2017,Africa,Northern Africa,Tunisia,Sers,8.93,36.11,2006-2008,,,,,,,,
Slama et al 2014,Africa,Northern Africa,Tunisia,,10.83,35.78,2009-2010,,,,,,,,
Slama et al 2015,Africa,Northern Africa,Tunisia,,10.83,35.73,2009,,,,,,,,
Slama et al 2015,Africa,Northern Africa,Tunisia,,10.82,35.57,2010,,,,,,,,
Slama et al 2015,Africa,Northern Africa,Tunisia,,10.83,35.63,2010,,,,,,,,
Slama et al 2015,Africa,Northern Africa,Tunisia,,11.04,35.52,2011,,,,,,,,
Szadziewski 1984,Africa,Northern Africa,Algeria,Akbou,4.537,36.463,1984,,,,,,,,
Talavera et al 2018,Europe,Southern Europe,Spain,La Almoraima,-5.72,36.45,2009/2010,,,,,,,,
Taylor et al 1991,Asia,Western Asia,Oman,Salalah,54.09,17.02,1991,,,,,,,,
Taylor et al 1991,Asia,Western Asia,Oman,Haima (Hayma),56.283,19.95,1991,,,,,,,,
Venail et al 2015,Africa,Middle Africa,Chad,,17.27,14.71,2014,,,,,,,,
Venter et al 1996,Africa,Southern Africa,Lesotho,"Roma, St Mary's high school, Lesotho",27.75,-29.45,1996,,,,,,,,
Venter et al 1996,Africa,Southern Africa,South Africa,Rian?s,28.267,-25.458,1996,,,,,,,,
Venter et al 1996,Africa,Southern Africa,South Africa,Kaalplaas,28.159,-25.635,1996,,,,,,,,
Venter et al 1996,Africa,Southern Africa,South Africa,Dalrika,28.317,-25.644,1996,,,,,,,,
Venter et al 1996,Africa,Southern Africa,South Africa,Giltford,28.214,-25.594,1996,,,,,,,,
Venter et al 1996,Africa,Southern Africa,South Africa,Lustig,28.202,-25.658,1996,,,,,,,,
Venter et al 1996,Africa,Southern Africa,South Africa,Derdepoort Resort,28.288,-25.686,1996,,,,,,,,
Venter et al 1996,Africa,Southern Africa,South Africa,Irene animal production institute,28.2,-25.833,1996,,,,,,,,
Venter et al 1996,Africa,Southern Africa,South Africa,Levonne,28.036,-25.663,1996,,,,,,,,
Venter et al 1996,Africa,Southern Africa,South Africa,JanSmit,27.972,-25.665,1996,,,,,,,,
Venter et al 1996,Africa,Southern Africa,South Africa,"Dohne research station, Stutterheim",27.467,-32.517,1996,,,,,,,,
Venter et al 1996,Africa,Southern Africa,South Africa,Adelaide experimental farm,26.333,-32.633,1996,,,,,,,,
Venter et al 1996,Africa,Southern Africa,South Africa,"Steytlerville, ""Orange grove""",24.433,-33.367,1996,,,,,,,,
Venter et al 1996,Africa,Southern Africa,South Africa,"Hluhluwe, lot H110",32.333,-28.083,1996,,,,,,,,
Venter et al 1996,Africa,Southern Africa,South Africa,"Mtubatuba, Kwazulu Natal",32.167,-28.467,1996,,,,,,,,
Venter et al 1996,Africa,Southern Africa,South Africa,"Tugela, Kwazulu Natal",31.413,-29.178,1996,,,,,,,,
Venter et al 1996,Africa,Southern Africa,South Africa,"Pietermaritzburg, Allerton regional laboratory",30.283,-29.533,1996,,,,,,,,
Venter et al 1996,Africa,Southern Africa,South Africa,"Pletermaritzburg, Ukulinga experimental farm",30.417,-29.667,1996,,,,,,,,
Venter et al 1996,Africa,Southern Africa,South Africa,"Diepsloot nature reserve, Gauteng",27.833,-25.833,1996,,,,,,,,
Venter et al 1996,Africa,Southern Africa,South Africa,"Soutpan experimental farm, Gauteng",28.083,-28.367,1996,,,,,,,,
Venter et al 1996,Africa,Southern Africa,South Africa,"Glen agricultural college, Free state",26.333,-28.95,1996,,,,,,,,
Venter et al 1996,Africa,Southern Africa,South Africa,Potchefstroom agricultural research laboratory,27.233,-26.583,1996,,,,,,,,
Venter et al 1996,Africa,Southern Africa,South Africa,"George, Outeniqua experimental farm",22.467,-33.967,1996,,,,,,,,
Venter et al 1996,Africa,Southern Africa,South Africa,"Stelienbosch ""Welgevallen""",18.867,-33.933,1996,,,,,,,,
Venter et al 1996,Africa,Southern Africa,South Africa,"Kimberley ""Mauritzfontein""",24.75,-28.817,1996,,,,,,,,
Venter et al 1996,Africa,Southern Africa,South Africa,Upington Karakul research station,21.333,-28.467,1996,,,,,,,,
Venter et al 1996,Africa,Southern Africa,South Africa,Messina experimental farm,29.917,-22.333,1996,,,,,,,,
Venter et al 1996,Africa,Southern Africa,South Africa,"Louis Trichardt, lot 285, Soutpansberg district",29.9,-23.05,1996,,,,,,,,
Venter et al 1996,Africa,Southern Africa,South Africa,"Bergpan salt works, Northern province",29.083,-23.083,1996,,,,,,,,
Venter et al 1996,Africa,Southern Africa,South Africa,"Tshipise, Aventura resorts",30.25,-22.55,1996,,,,,,,,
Venter et al 1996,Africa,Southern Africa,South Africa,"Eiland, Aventura resorts",30.75,-23.667,1996,,,,,,,,
Venter et al 1996,Africa,Southern Africa,South Africa,Loskop dam nature reserve,29.433,-25.467,1996,,,,,,,,
Venter et al 1996,Africa,Southern Africa,South Africa,"Groblersdal, ""Weber farm""",29.433,-25.25,1996,,,,,,,,
Venter et al 1996,Africa,Southern Africa,South Africa,"Middelburg, ""Springboklaagte"", Mpumalanga",29.733,-25.8,1996,,,,,,,,
Venter et al 1996,Africa,Southern Africa,South Africa,"Ermelo, ""Ystervarkfontein""",29.983,-26.517,1996,,,,,,,,
Venter et al 2000,Africa,Southern Africa,South Africa,Ondertsepoort,28.183,-25.483,1998,,,,,,,,
Venter et al 2000,Africa,Southern Africa,South Africa,Clarens,28.417,-28.533,1998,,,,,,,,
Walker 1977,Africa,Eastern Africa,Kenya,Kiambu,36.783,-1.133,1977,,,,,,,,
Walker 1977,Africa,Eastern Africa,Kenya,Koma,37.05,-1.217,1977,,,,,,,,
Walker 1977,Africa,Eastern Africa,Kenya,Thiba,37.367,-0.717,1977,,,,,,,,
Walker 1977,Africa,Eastern Africa,Kenya,Embakasi,36.95,-1.283,1977,,,,,,,,
Walker 1977,Africa,Eastern Africa,Kenya,Kabete,36.733,-1.267,1977,,,,,,,,
Walker 1977,Africa,Eastern Africa,Kenya,Molo,35.683,-0.283,1977,,,,,,,,
Walker 1977,Africa,Eastern Africa,Kenya,Kitale,34.917,1.083,1977,,,,,,,,
Walker 1977,Africa,Eastern Africa,Kenya,Eldoret,35.367,0.5,1977,,,,,,,,
Walker 1977,Africa,Eastern Africa,Kenya,Longonot,36.417,-0.867,1977,,,,,,,,
Walker 1977,Africa,Eastern Africa,Kenya,Morendat,36.367,-0.567,1977,,,,,,,,
Walker 1977,Africa,Eastern Africa,Kenya,Mbaruk,36.2,-0.4,1977,,,,,,,,
Walker 1977,Africa,Eastern Africa,Kenya,Nyahururu,36.55,0.1,1977,,,,,,,,
Walker 1977,Africa,Eastern Africa,Kenya,Maralal,36.567,1.083,1977,,,,,,,,
Walker 1977,Africa,Eastern Africa,Kenya,Naibor Keju,36.833,0.967,1977,,,,,,,,
Walker 1977,Africa,Eastern Africa,Kenya,Kiu,36.783,-1.95,1977,,,,,,,,
Walker 1977,Africa,Eastern Africa,Kenya,Sukuta Marmar,36.717,0.767,1977,,,,,,,,
Walker 1977,Africa,Eastern Africa,Kenya,Makutano,37.667,-2.517,1977,,,,,,,,
Walker 1977,Africa,Eastern Africa,Kenya,Magadi,36.117,-1.9,1977,,,,,,,,
Walker 1977,Africa,Eastern Africa,Kenya,Nakuru,36.117,-0.417,1977,,,,,,,,
Walker 1977,Africa,Eastern Africa,Kenya,Ol Tukai,37.267,-2.633,1977,,,,,,,,
Walker 1977,Africa,Eastern Africa,Kenya,Mirogi,34.383,-0.733,1977,,,,,,,,
Walker 1977,Africa,Eastern Africa,Kenya,Olambwe,34.333,-0.633,1977,,,,,,,,
Walker 1977,Africa,Eastern Africa,Kenya,Embu,37.467,-0.533,1977,,,,,,,,
Walker 1977,Africa,Eastern Africa,Kenya,Ruiru,36.967,-1.367,1977,,,,,,,,
Walker 1977,Africa,Eastern Africa,Kenya,Machakos,37.233,-1.533,1977,,,,,,,,
Walker 1977,Africa,Eastern Africa,Kenya,Nayuki,37.167,0.033,1977,,,,,,,,
Walker 1977,Africa,Eastern Africa,Kenya,Lukenya,37.067,-1.467,1977,,,,,,,,
Walker 1977,Africa,Eastern Africa,Kenya,Makindu,37.733,-2.217,1977,,,,,,,,
Walker 1977,Africa,Eastern Africa,Kenya,Ikutha,38.15,-2.083,1977,,,,,,,,
Walker 1977,Africa,Eastern Africa,Kenya,Isiolo,37.8,0.433,1977,,,,,,,,
Walker 1977,Africa,Eastern Africa,Kenya,Samburu,37.533,0.583,1977,,,,,,,,
Walker 1977,Africa,Eastern Africa,Kenya,Ukunda,39.567,-4.283,1977,,,,,,,,
Walker 1977,Africa,Eastern Africa,Kenya,Gede,40.033,-3.317,1977,,,,,,,,
Walker 1977,Africa,Eastern Africa,Kenya,Voi,38.583,-3.417,1977,,,,,,,,
Walker 1977,Africa,Eastern Africa,Kenya,Lali,39.333,-3.067,1977,,,,,,,,
Walker 1977,Africa,Eastern Africa,Tanzania,Namanga,36.6,-2.533,1977,,,,,,,,
Wirth and Hubert 1989,Asia,South-Eastern Asia,Thailand,Nakonprathrom porvince (=Nakhon Patho?),100.094,13.934,1989,,,,,,,,
Wirth and Hubert 1989,Asia,South-Eastern Asia,Thailand,"Saraburi province, A Prabuddhabat",100.993,14.604,1989,,,,,,,,
Wirth and Hubert 1989,Asia,South-Eastern Asia,Thailand,"Nakronrajasrima province, Amphoe Muang (=Mueang Nakhon Ra?)",102.096,14.975,1989,,,,,,,,
Wirth and Hubert 1989,Asia,South-Eastern Asia,Thailand,"Udrontani province,Amphoe Nong Han(=Udon Thani?)",103.119,17.326,1989,,,,,,,,
Wirth and Hubert 1989,Asia,South-Eastern Asia,Thailand,"Udrontani province, Amphoe Muang(=Udon Thani?)",102.794,17.409,1989,,,,,,,,
Wirth and Hubert 1989,Asia,South-Eastern Asia,Thailand,"Udrontani province,Amphoe Pen (=Udon Thani?)",102.934,17.654,1989,,,,,,,,
Wirth and Hubert 1989,Asia,South-Eastern Asia,Thailand,"Chonburi province, Bangphra (Si Racha)",101.003,13.222,1989,,,,,,,,
Wirth and Hubert 1989,Asia,South-Eastern Asia,Thailand,Miniburi Province (=Min Buri district?),100.754,13.806,1989,,,,,,,,
Wirth and Hubert 1989,Asia,South-Eastern Asia,Thailand,"Nong Kai province, Amphoe Ta Bo",102.57,17.794,1989,,,,,,,,
Wirth and Hubert 1989,Asia,South-Eastern Asia,Thailand,"Nong Kai province, Amphoe Juang (=Mueang?)",102.808,17.85,1989,,,,,,,,
Wirth and Hubert 1989,Asia,South-Eastern Asia,Thailand,Samathprakan province (=Samut Prakan?),100.721,13.595,1989,,,,,,,,
Wirth and Hubert 1989,Asia,South-Eastern Asia,Thailand,"Khon Kaen Province, Amphoe muang",102.804,16.456,1989,,,,,,,,
Wirth and Hubert 1989,Asia,South-Eastern Asia,Thailand,"Sakhonakron province, Amphoe Muang (=Sakon Nakhon?)",104.1,17.161,1989,,,,,,,,
Wirth and Hubert 1989,Asia,South-Eastern Asia,Thailand,"Amphoe Muang (=Mueang ?), Loei province",101.719,17.553,1989,,,,,,,,
Wirth and Hubert 1989,Asia,South-Eastern Asia,Thailand,"Amphoe Ta Lee (=Tha Li ?), Loei province",101.441,17.623,1989,,,,,,,,
Wirth and Hubert 1989,Asia,South-Eastern Asia,Thailand,Chiang Mai province,98.716,18.824,1989,,,,,,,,
Wirth and Hubert 1989,Asia,South-Eastern Asia,Thailand,Nonthaburi province,100.412,13.895,1989,,,,,,,,
Wirth and Hubert 1989,Asia,South-Eastern Asia,Vietnam,"Phan Rang, 14 km west",108.995,11.563,1989,,,,,,,,
Yu 2005,Asia,Eastern Asia,China,Qiongzhong (Hainan province),109.838,19.033,1996,,,,,,,,
